# Supplementary material
Source: PubMed Central journal article supplement (PMC3740597)

Supporting Information for:

**Combining Transition Metal Catalysis with Radical Chemistry: Dramatic Acceleration of  
Palladium-Catalyzed C–H Arylation with Diaryliodonium Salts**

Sharon R. Neufeldt and Melanie S. Sanford\*

*University of Michigan, Department of Chemistry  
930 N. University Ave., Ann Arbor, MI 48109*

## Table of Contents

|       |                                                       |        |
|-------|-------------------------------------------------------|--------|
| I.    | General Procedures and Materials and Methods          | p. S3  |
| II.   | Synthesis and Characterization of Products in Table 2 | p. S4  |
| III.  | Synthesis and Characterization of Products in Table 3 | p. S8  |
| IV.   | Experimental Details for Table 4                      | p. S12 |
| V.    | Experimental Details for Equation 1                   | p. S13 |
| VI.   | Experimental Details for Table 5                      | p. S14 |
| VII.  | References                                            | p. S15 |
| VIII. | $^1\text{H}$ and $^{13}\text{C}$ NMR Spectra          | p. S16 |

## I. General Procedures

NMR spectra were obtained on a Varian vnmrs 700 (699.76 MHz for  $^1\text{H}$ ; 175.95 MHz for  $^{13}\text{C}$ ; 658.43 for  $^{19}\text{F}$ ), Varian vnmrs 500 (500.10 MHz for  $^1\text{H}$ ; 125.75 MHz for  $^{13}\text{C}$ , 470.56 MHz for  $^{19}\text{F}$ ), Varian Inova 500 (499.90 MHz for  $^1\text{H}$ ; 125.70 MHz for  $^{13}\text{C}$ ), or a Varian MR400 (400.52 MHz for  $^1\text{H}$ ; 100.71 for  $^{13}\text{C}$ , 376.87 MHz for  $^{19}\text{F}$ ) spectrometer.  $^1\text{H}$  NMR chemical shifts are reported in parts per million (ppm) relative to TMS, with the residual solvent peak used as an internal reference. Multiplicities are reported as follows: singlet (s), doublet (d), doublet of doublets (dd), doublet of doublets of doublets (ddd), doublet of triplets (dt), triplet (t), triplet of doublets (td), triplet of triplets (tt), quartet (q), quintet (quin), multiplet (m), and broad resonance (br). IR spectra were obtained on a Perkin-Elmer Spectrum BX FT-IR spectrometer. Melting points were determined with a Mel-Temp 3.0, a Laboratory Devices Inc, USA instrument, and are uncorrected. HRMS data were obtained on a Micromass AutoSpec Ultima Magnetic Sector mass spectrometer. Gas chromatography was carried out on a Shimadzu 17A using a Restek Rtx®-5 (Crossbond 5% diphenyl – 95% dimethyl polysiloxane; 15 m, 0.25 mm ID, 0.25  $\mu\text{m}$  df) column. GC calibrated yields are reported relative to hexadecane as an internal standard.

**Materials and Methods:** Substrates **2**<sup>1</sup> and **8**<sup>2</sup> were prepared according to literature procedures. Substrate **9** was prepared by a palladium-catalyzed Suzuki coupling between 2-methoxyboronic acid and 2-bromopyridine. Oxime ethers **10** and **11** were prepared by the reaction of the corresponding ketones with  $\text{MeONH}_2\cdot\text{HCl}$  in pyridine.<sup>3</sup> The remaining substrates were obtained from Aldrich (**1**, **5**, and **7**), Alfa Aesar (**3** and **4**), or Acros (**6**) and were used as received.  $[\text{Ph}_2\text{I}]\text{BF}_4$  and  $[\text{Mes-I-Ph}]\text{BF}_4$  were prepared by the reaction of  $\text{PhI}(\text{OAc})_2$  or  $\text{MesI}(\text{OAc})_2$  with  $\text{PhB}(\text{OH})_2$  in the presence of  $\text{BF}_3\cdot\text{Et}_2\text{O}$ .<sup>4</sup>  $[\text{Ph}_2\text{I}]\text{OTf}$  and  $[\text{Mes}_2\text{I}]\text{OTf}$  were prepared by the reaction of iodobenzene or iodomesitylene with *m*CPBA and benzene or mesitylene in the presence of TfOH.<sup>5</sup> Unsymmetrical  $[\text{Ar-I-Ph}]\text{BF}_4$  salts were prepared by the reaction of an aryl iodide with *m*-CPBA and  $\text{PhB}(\text{OH})_2$  in the presence of  $\text{BF}_3\cdot\text{Et}_2\text{O}$ .<sup>6</sup> Symmetrical  $[\text{Ar}_2\text{I}]\text{BF}_4$  salts were prepared by the reaction of an aryl iodide with *m*-CPBA and the corresponding arylboronic acid in the presence of  $\text{BF}_3\cdot\text{Et}_2\text{O}$ .<sup>6</sup>  $\text{Pd}(\text{OAc})_2$ , obtained from Pressure Chemical, and  $\text{Pd}(\text{NO}_3)_2$  and  $\text{Ru}(\text{bpy})_3\text{Cl}_2\cdot 6\text{H}_2\text{O}$ , obtained from Strem, were used as received.  $\text{Ir}(\text{ppy})_3$ ,<sup>7</sup> and  $\text{Ir}(\text{ppy})_2(\text{dtbbpy})\text{PF}_6$ <sup>8</sup> were prepared according to literature procedures. Solvents were obtained from Fisher Chemical and used without further purification. Flash chromatography was performed on EM Science silica gel 60 (0.040–0.063 mm particle size, 230–400 mesh) and thin layer chromatography was performed on Merck TLC plates pre-coated with silica gel 60 F<sub>254</sub>.

## II. Synthesis and Characterization of Products in Table 2

**General Procedure:** Substrate (1 equiv), [Ph<sub>2</sub>I]BF<sub>4</sub> or [Ph<sub>2</sub>I]OTf (2 equiv), Ir(ppy)<sub>2</sub>(dtbbpy)PF<sub>6</sub> (0.05 equiv), and Pd(NO<sub>3</sub>)<sub>2</sub>•2H<sub>2</sub>O (0.10 equiv) were combined in MeOH in a 4 mL scintillation vial. For substrates containing *N*-acetyl moieties (noted below), MgO (1 equiv) was also included and appeared to help prevent substrate and/or product degradation. The reaction mixture was cooled in an ice bath (to prevent evaporation) and sparged with N<sub>2</sub> using a submerged needle for 10 min, and the vial was then immediately sealed with a Teflon-lined cap. The vial was placed on a stir plate with two 26 W compact fluorescent light bulbs (one on either side of the vial about 5–8 cm away), and the reaction mixture was allowed to stir at room temperature for 15 h. The reaction mixture was diluted with EtOAc (50 mL) and washed with 10% aqueous Na<sub>2</sub>SO<sub>3</sub> (2 x 25 mL) and brine (1 x 25 mL). The combined aqueous layers were extracted with EtOAc (3 x 10 mL), and the organic layers were then combined, dried over MgSO<sub>4</sub>, filtered, concentrated, and purified by column chromatography on silica gel.

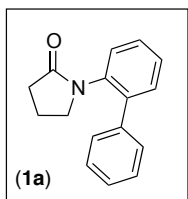

**Pyrrolidinone 1a.** The general procedure was followed utilizing substrate **1** (80.6 mg, 0.50 mmol, 1.0 equiv), [Ph<sub>2</sub>I]OTf (430 mg, 1.00 mmol, 2 equiv), Ir(ppy)<sub>2</sub>(dtbbpy)PF<sub>6</sub> (22.8 mg, 0.025 mmol, 0.05 equiv), Pd(NO<sub>3</sub>)<sub>2</sub>•2H<sub>2</sub>O (13.3 mg, 0.05 mmol, 0.10 equiv), and MeOH (2.5 mL). Product **1a** was obtained as a pale yellow oil (96.3 mg, 81% yield, R<sub>f</sub> = 0.17 in 20% hexanes/80% Et<sub>2</sub>O). <sup>1</sup>H and <sup>13</sup>C NMR data matched those reported in the literature.<sup>9</sup>

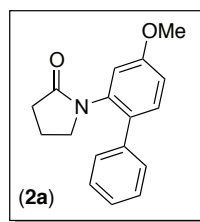

**Pyrrolidinone 2a.** The general procedure was followed utilizing substrate **2** (47.8 mg, 0.25 mmol, 1.0 equiv), [Ph<sub>2</sub>I]OTf (215 mg, 0.50 mmol, 2 equiv), Ir(ppy)<sub>2</sub>(dtbbpy)PF<sub>6</sub> (11.4 mg, 0.0125 mmol, 0.05 equiv), Pd(NO<sub>3</sub>)<sub>2</sub>•2H<sub>2</sub>O (6.7 mg, 0.025 mmol, 0.10 equiv), and MeOH (1.8 mL). Product **2a** was obtained as a pale yellow solid [62.5 mg, 94% yield, R<sub>f</sub> = 0.10 in 20% hexanes/80% Et<sub>2</sub>O, mp = 72.9–74.7 °C (lit.<sup>11</sup> 61–64 °C)]. <sup>1</sup>H and <sup>13</sup>C NMR data matched those reported in the literature.<sup>9</sup>

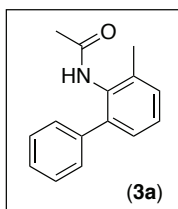

**Acetanilide 3a.** The general procedure was followed utilizing substrate **3** (37.3 mg, 0.25 mmol, 1.0 equiv), [Ph<sub>2</sub>I]BF<sub>4</sub> (184 mg, 0.50 mmol, 2 equiv), Ir(ppy)<sub>2</sub>(dtbbpy)PF<sub>6</sub> (11.4 mg, 0.0125 mmol, 0.05 equiv), Pd(NO<sub>3</sub>)<sub>2</sub>•2H<sub>2</sub>O (6.7 mg, 0.025 mmol, 0.10 equiv), and MeOH (1.25 mL), with the addition of MgO (10.1 mg, 0.25 mmol, 1.0 equiv). Product **3a** was obtained as a pale yellow solid [40.6 mg, 72% yield, R<sub>f</sub> = 0.17 in 30% hexanes/70% Et<sub>2</sub>O, mp = 134.5–136.0 °C (lit. 139–140 °C)].<sup>10</sup> <sup>1</sup>H NMR (700 MHz, CD<sub>3</sub>CN): δ

7.64 (br s, 1H); 7.42–7.39 (multiple peaks, 2H); 7.35 (t,  $J = 7.4$  Hz, 1H); 7.32–7.31 (multiple peaks, 2H); 7.27 (d,  $J = 4.9$  Hz, 2H); 7.17 (t,  $J = 4.9$  Hz, 1H); 2.23 (s, 3H); 1.85 (s, 3H).  $^{13}\text{C}\{^1\text{H}\}$  NMR (176 MHz,  $\text{CD}_3\text{CN}$ ):  $\delta$  170.04; 141.30; 140.97; 138.16; 134.58; 130.52; 129.67; 129.03; 128.72; 128.14; 128.05; 22.76; 18.54. IR (thin film,  $\text{CH}_2\text{Cl}_2$ ) 3246, 3026, 2922, 1652, 1522  $\text{cm}^{-1}$ . HRMS  $[\text{M}+\text{H}]^+$  Calcd for  $\text{C}_{15}\text{H}_{16}\text{NO}$ : 226.1226; Found: 226.1234.

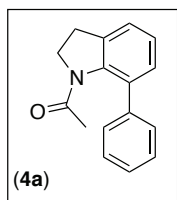

**Acetylidoline 4a.** The general procedure was followed utilizing substrate **4** (80.5 mg, 0.50 mmol, 1.0 equiv),  $[\text{Ph}_2\text{I}]\text{BF}_4$  (368 mg, 1.00 mmol, 2 equiv),  $\text{Ir}(\text{ppy})_2(\text{dtbbpy})\text{PF}_6$  (22.8 mg, 0.025 mmol, 0.05 equiv),  $\text{Pd}(\text{NO}_3)_2 \cdot 2\text{H}_2\text{O}$  (26.6 mg, 0.100 mmol, 0.20 equiv), and MeOH (2.5 mL), with the addition of MgO (20.2 mg, 0.50 mmol, 1.0 equiv). Product **4a** was obtained as a pale yellow solid [51.7 mg, 44% yield,  $R_f = 0.30$  in 20% hexanes/80%  $\text{Et}_2\text{O}$ , mp = 116.3–117.8 °C (lit. 117–119 °C)].  $^1\text{H}$  and  $^{13}\text{C}$  NMR data matched those reported in the literature.<sup>11</sup>

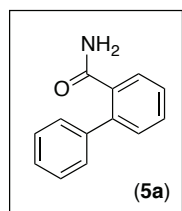

**Benzamide 5a.** The general procedure was followed utilizing substrate **5** (33.8 mg, 0.50 mmol, 1.0 equiv),  $[\text{Ph}_2\text{I}]\text{BF}_4$  (368 mg, 1.00 mmol, 2 equiv),  $\text{Ir}(\text{ppy})_2(\text{dtbbpy})\text{PF}_6$  (22.8 mg, 0.025 mmol, 0.05 equiv),  $\text{Pd}(\text{NO}_3)_2 \cdot 2\text{H}_2\text{O}$  (13.3 mg, 0.050 mmol, 0.10 equiv), and MeOH (2.5 mL). Product **5a** was obtained as a white solid (39 mg, 40% yield,  $R_f = 0.26$  in 1:1:1 benzene: $\text{CH}_2\text{Cl}_2$ : $\text{Et}_2\text{O}$ , mp = 169.0–173.0 °C).  $^1\text{H}$  NMR (700 MHz,  $\text{CDCl}_3$ ):  $\delta$  7.79 (d,  $J = 7.7$  Hz, 1H), 7.50 (td,  $J = 7.7, 0.7$  Hz, 1H), 7.46–7.42 (multiple peaks, 5H), 7.39 (m, 1H), 7.37 (dd,  $J = 7.7, 0.7$  Hz, 1H), 5.62 (br s, 1H), 5.25 (br s, 1H).  $^{13}\text{C}\{^1\text{H}\}$  NMR (176 MHz,  $\text{CDCl}_3$ ):  $\delta$  171.21, 140.15, 139.80, 134.30, 130.54, 130.38, 129.08, 128.77, 128.69, 127.93, 127.62. IR (thin film,  $\text{CDCl}_3$ ) 3383, 3178, 1653, 1643  $\text{cm}^{-1}$ . HRMS  $[\text{M}+\text{H}]^+$  Calcd for  $\text{C}_{13}\text{H}_{12}\text{NO}$ : 198.0913; Found: 198.0920.

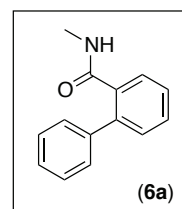

**Benzamide 6a.** The general procedure was followed utilizing substrate **6** (67.6 mg, 0.50 mmol, 1.0 equiv),  $[\text{Ph}_2\text{I}]\text{OTf}$  (430 mg, 1.00 mmol, 2 equiv),  $\text{Ir}(\text{ppy})_2(\text{dtbbpy})\text{PF}_6$  (22.8 mg, 0.025 mmol, 0.05 equiv),  $\text{Pd}(\text{NO}_3)_2 \cdot 2\text{H}_2\text{O}$  (13.3 mg, 0.05 mmol, 0.10 equiv), and MeOH (2.5 mL). Product **6a** was obtained as a pale yellow solid (56.7 mg, 54% yield,  $R_f = 0.27$  in 20% hexanes/80%  $\text{Et}_2\text{O}$ , mp = 164.5–166.8 °C).  $^1\text{H}$  NMR (400 MHz,  $\text{CDCl}_3$ ):  $\delta$  7.69 (dd,  $J = 7.6, 1.6$  Hz, 1H), 7.47 (td,  $J = 7.6, 1.2$  Hz, 1H), 7.42–7.35 (multiple peaks, 7H), 5.19 (br s, 1H), 2.67 (d,  $J = 4.8$  Hz, 3H).  $^{13}\text{C}\{^1\text{H}\}$  NMR (100 MHz,  $\text{CDCl}_3$ ):  $\delta$  170.24, 140.12, 139.29, 135.68, 130.11, 130.10, 128.82, 128.60, 128.58, 127.75, 127.59, 26.64. IR (thin film,  $\text{CDCl}_3$ )

3286, 3060, 2936, 1636, 1540, 1313  $\text{cm}^{-1}$ . HRMS  $[\text{M}+\text{H}]^+$  Calcd for  $\text{C}_{14}\text{H}_{14}\text{NO}$ : 212.1070; Found: 212.1074.

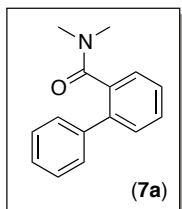

**Benzamide 7a.** The general procedure was followed utilizing substrate **7** (74.6 mg, 0.50 mmol, 1.0 equiv),  $[\text{Ph}_2\text{I}]\text{OTf}$  (430 mg, 1.00 mmol, 2 equiv),  $\text{Ir}(\text{ppy})_2(\text{dtbbpy})\text{PF}_6$  (22.8 mg, 0.025 mmol, 0.05 equiv),  $\text{Pd}(\text{NO}_3)_2 \cdot 2\text{H}_2\text{O}$  (13.3 mg, 0.05 mmol, 0.10 equiv), and MeOH (2.5 mL). Product **7a** was obtained as a yellow oil (9.8 mg, 9% yield,  $R_f = 0.27$  in 20% hexanes/80% Et<sub>2</sub>O).  $^1\text{H}$  NMR (400 MHz,  $\text{CDCl}_3$ ):  $\delta$  7.48-7.44 (multiple peaks, 3H), 7.42-7.32 (multiple peaks, 6H), 2.85 (s, 3H), 2.39 (s, 3H).  $^{13}\text{C}\{^1\text{H}\}$  NMR (100 MHz,  $\text{CDCl}_3$ ):  $\delta$  171.33, 139.93, 138.67, 135.74, 129.30, 128.47, 128.36, 127.70, 127.58, 127.41, 37.94, 24.53. Two aromatic  $^{13}\text{C}$  resonances are coincidentally overlapping. IR (thin film,  $\text{CDCl}_3$ ) 3057, 2924, 1624, 1394  $\text{cm}^{-1}$ . HRMS  $[\text{M}+\text{H}]^+$  Calcd for  $\text{C}_{15}\text{H}_{16}\text{NO}$ : 226.1226; Found: 226.1232.

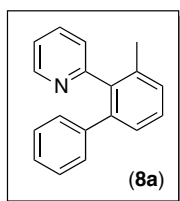

**Pyridine 8a.** The general procedure was followed utilizing substrate **8** (84.6 mg, 0.50 mmol, 1.0 equiv),  $[\text{Ph}_2\text{I}]\text{OTf}$  (430 mg, 1.00 mmol, 2 equiv),  $\text{Ir}(\text{ppy})_2(\text{dtbbpy})\text{PF}_6$  (22.8 mg, 0.025 mmol, 0.05 equiv),  $\text{Pd}(\text{NO}_3)_2 \cdot 2\text{H}_2\text{O}$  (13.3 mg, 0.050 mmol, 0.10 equiv), and MeOH (2.5 mL). Product **8a** was obtained as a clear viscous oil (76.0 mg, 62% yield,  $R_f = 0.09$  in 90% hexanes/10% Et<sub>2</sub>O).  $^1\text{H}$  and  $^{13}\text{C}$  NMR data matched those reported in the literature.<sup>9</sup>

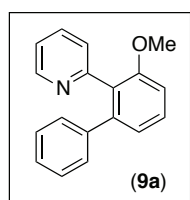

**Pyridine 9a.** The general procedure was followed utilizing substrate **9** (92.6 mg, 0.50 mmol, 1.0 equiv),  $[\text{Ph}_2\text{I}]\text{OTf}$  (430 mg, 1.00 mmol, 2 equiv),  $\text{Ir}(\text{ppy})_2(\text{dtbbpy})\text{PF}_6$  (22.8 mg, 0.025 mmol, 0.05 equiv),  $\text{Pd}(\text{NO}_3)_2 \cdot 2\text{H}_2\text{O}$  (13.3 mg, 0.050 mmol, 0.10 equiv), and MeOH (2.5 mL). Product **9a** was obtained as a pale yellow solid [88.0 mg, 67% yield,  $R_f = 0.11$  in 60% hexanes/40% Et<sub>2</sub>O, mp = 83.5-86.4 °C (lit. 77.7-85.4 °C)].<sup>9</sup>  $^1\text{H}$  and  $^{13}\text{C}$  NMR data matched those reported in the literature.<sup>9</sup>

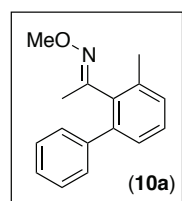

**Oxime ether 10a.** The general procedure was followed utilizing substrate **10** (81.6 mg, 0.50 mmol, 1.0 equiv),  $[\text{Ph}_2\text{I}]\text{OTf}$  (430 mg, 1.00 mmol, 2 equiv),  $\text{Ir}(\text{ppy})_2(\text{dtbbpy})\text{PF}_6$  (22.8 mg, 0.025 mmol, 0.05 equiv),  $\text{Pd}(\text{NO}_3)_2 \cdot 2\text{H}_2\text{O}$  (13.3 mg, 0.050 mmol, 0.10 equiv), and MeOH (2.5 mL). Product **10a** was obtained as a colorless oil (71.4 mg, 60% yield,  $R_f = 0.14$  in 98% hexanes/2% Et<sub>2</sub>O).  $^1\text{H}$  NMR (700 MHz,  $\text{CDCl}_3$ ):  $\delta$  7.39-7.36 (multiple peaks, 4H), 7.32 (m, 1H), 7.29 (d,  $J = 7.7$  Hz, 1H), 7.23 (dd,  $J = 7.0, 0.7$  Hz, 1H), 7.20 (dd,  $J = 7.7, 0.7$  Hz, 1H), 3.92 (s, 3H), 2.37 (s, 3H), 1.69 (s, 3H).  $^{13}\text{C}\{^1\text{H}\}$  NMR (176 MHz,  $\text{CDCl}_3$ ):  $\delta$  156.52,

141.21, 140.97, 136.19, 136.07, 129.38, 129.34, 128.13, 127.94, 127.63, 126.92, 61.62, 20.08, 16.56. IR (thin film, neat) 3060, 2936, 1459, 1041  $\text{cm}^{-1}$ . HRMS  $[\text{M}+\text{H}]^+$  Calcd for  $\text{C}_{16}\text{H}_{18}\text{NO}$ : 240.1383; Found: 240.1387.

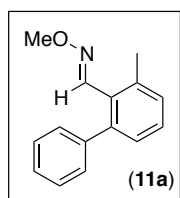

**Oxime ether 11a.** The general procedure was followed utilizing substrate **11** (74.6 mg, 0.50 mmol, 1.0 equiv),  $[\text{Ph}_2\text{I}]\text{OTf}$  (430 mg, 1.00 mmol, 2 equiv),  $\text{Ir}(\text{ppy})_2(\text{dtbbpy})\text{PF}_6$  (22.8 mg, 0.025 mmol, 0.05 equiv),  $\text{Pd}(\text{NO}_3)_2 \cdot 2\text{H}_2\text{O}$  (13.3 mg, 0.050 mmol, 0.10 equiv), and MeOH (2.5 mL). Product **11a** was obtained as a colorless oil consisting of a ~1.5:1 mixture of oxime stereoisomers (64.7 mg, 57% yield,  $R_f = 0.28$  (major) and 0.14 (minor) in 6:1:0.2 hexanes/benzene/methylene chloride). Major Isomer:  $^1\text{H}$  NMR (700 MHz,  $\text{C}_6\text{D}_6$ ):  $\delta$  8.26 (s, 1H); 7.22 (m, 2H), 7.09 (tt,  $J = 7.4, 1.4$  Hz, 2H); 7.06-7.05 (multiple peaks, 2H); 7.04-7.02 (multiple peaks, 2H); 3.76 (s, 3H), 2.62 (s, 3H).  $^{13}\text{C}\{^1\text{H}\}$  NMR (100 MHz,  $\text{CDCl}_3$ ):  $\delta$  149.09, 143.18, 140.66, 137.83, 130.33, 129.83, 128.48, 128.12, 127.84, 127.21, 61.85, 22.46. Two aromatic  $^{13}\text{C}$  resonances are coincidentally overlapping. IR (thin film, neat) 3059, 2935, 1460, 1048  $\text{cm}^{-1}$ . HRMS  $[\text{M}+\text{H}]^+$  Calcd for  $\text{C}_{15}\text{H}_{16}\text{NO}$ : 226.1226; Found: 226.1227. Minor Isomer:  $^1\text{H}$  NMR (700 MHz,  $\text{C}_6\text{D}_6$ ):  $\delta$  7.40 (d,  $J = 7.7$  Hz, 2H); 7.24 (s, 1H); 7.19 (t,  $J = 7.7$  Hz, 2H); 7.13-7.10 (multiple peaks, 2H); 7.08 (t,  $J = 7.7$  Hz, 1H); 6.98 (d,  $J = 7.7$  Hz, 1H); 3.66 (s, 3H); 2.22 (s, 3H).  $^{13}\text{C}\{^1\text{H}\}$  NMR (100 MHz,  $\text{CDCl}_3$ ):  $\delta$  147.58, 140.70, 140.66, 136.43, 130.19, 128.87, 128.84, 128.74, 128.05, 127.36, 126.99, 61.79, 20.13. IR (thin film,  $\text{CDCl}_3$ ) 3059, 2935, 1460, 1057  $\text{cm}^{-1}$ . HRMS  $[\text{M}+\text{H}]^+$  Calcd for  $\text{C}_{15}\text{H}_{16}\text{NO}$ : 226.1226; Found: 226.1228.

### III. Synthesis and Characterization of Products in Table 3

**General Procedure:** Substrate (1 equiv),  $[\text{Ar}_2\text{I}]\text{BF}_4$  (2 equiv),  $\text{Ir}(\text{ppy})_2(\text{dtbbpy})\text{PF}_6$  (0.05 equiv), and  $\text{Pd}(\text{NO}_3)_2 \cdot 2\text{H}_2\text{O}$  (0.10 equiv) were combined in MeOH in a 4 mL scintillation vial. The reaction mixture was cooled in an ice bath (to prevent evaporation) and sparged with  $\text{N}_2$  using a submerged needle for 10 min, and the vial was then immediately sealed with a Teflon-lined cap. The vial was placed on a stir plate with two 26 W compact fluorescent light bulbs (one on either side of the vial about 5–8 cm away), and the reaction mixture was allowed to stir at room temperature for 15 h. The reaction mixture was diluted with EtOAc (50 mL) and washed with 10% aqueous  $\text{Na}_2\text{SO}_3$  (2 x 25 mL) and brine (1 x 25 mL). The combined aqueous layers were extracted with EtOAc (3 x 10 mL), and the organic layers were then combined, dried over  $\text{MgSO}_4$ , filtered, concentrated, and purified by column chromatography on silica gel.

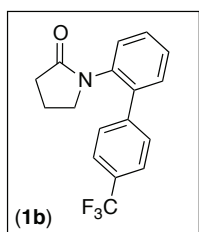

**Pyrrolidinone 1b.** The general procedure was followed utilizing substrate **1** (80.6 mg, 0.50 mmol, 1.0 equiv),  $[(p\text{-CF}_3\text{C}_6\text{H}_4)_2\text{I}]\text{BF}_4$  (504 mg, 1.00 mmol, 2 equiv),  $\text{Ir}(\text{ppy})_2(\text{dtbbpy})\text{PF}_6$  (22.8 mg, 0.025 mmol, 0.05 equiv),  $\text{Pd}(\text{NO}_3)_2 \cdot 2\text{H}_2\text{O}$  (13.3 mg, 0.050 mmol, 0.10 equiv), and MeOH (2.5 mL). Product **1b** was obtained as a tan solid [106 mg, 69% yield,  $R_f = 0.17$  in 20% hexanes/80%  $\text{Et}_2\text{O}$ , mp = 87.6–89.2 °C (lit. 86.1–88.0 °C)].<sup>9</sup>  $^1\text{H}$  and  $^{13}\text{C}$  NMR data matched those reported in the literature.<sup>9</sup>

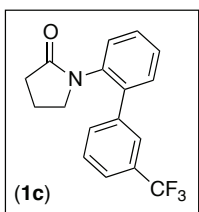

**Pyrrolidinone 1c.** The general procedure was followed utilizing substrate **1** (80.6 mg, 0.50 mmol, 1.0 equiv),  $[(m\text{-CF}_3\text{C}_6\text{H}_4)_2\text{I}]\text{BF}_4$  (504 mg, 1.00 mmol, 2 equiv),  $\text{Ir}(\text{ppy})_2(\text{dtbbpy})\text{PF}_6$  (22.8 mg, 0.025 mmol, 0.05 equiv),  $\text{Pd}(\text{NO}_3)_2 \cdot 2\text{H}_2\text{O}$  (13.3 mg, 0.050 mmol, 0.10 equiv), and MeOH (2.5 mL). Product **1c** was obtained as a tan solid [86.1 mg, 56% yield,  $R_f = 0.23$  in 20% hexanes/80%  $\text{Et}_2\text{O}$ , mp = 79.2–83.5 °C].

$^1\text{H}$  NMR (700 MHz,  $\text{CDCl}_3$ ):  $\delta$  7.64 (br s, 1H), 7.62 (d,  $J = 8.4$  Hz, 1H), 7.60 (d,  $J = 7.7$  Hz, 1H), 7.53 (t,  $J = 7.7$  Hz, 1H), 7.45 (m, 1H), 7.41–7.40 (multiple peaks, 2H), 7.33 (d,  $J = 7.7$  Hz, 1H), 3.28 (t,  $J = 7.0$  Hz, 2H), 2.40 (t,  $J = 8.1$  Hz, 2H), 1.91 (tt,  $J = 8.1, 7.0$  Hz, 2H).  $^{13}\text{C}\{^1\text{H}\}$  NMR (176 MHz,  $\text{CDCl}_3$ ):  $\delta$  175.42, 139.84, 138.11, 136.29, 131.80, 130.71 (q,  $J_{\text{C-F}} = 32$  Hz), 130.60, 129.25, 128.96, 128.30, 128.25, 124.99 (q,  $J_{\text{C-F}} = 3.6$  Hz), 124.21 (q,  $J_{\text{C-F}} = 3.8$  Hz), 123.97 (q,  $J_{\text{C-F}} = 272$  Hz), 50.30, 30.93, 18.83.  $^{19}\text{F}$  NMR (376 MHz,  $\text{CDCl}_3$ ):  $\delta$  -62.65 (s). IR (thin film,  $\text{CDCl}_3$ ) 2918, 1692, 1333, 1117  $\text{cm}^{-1}$ . HRMS  $[\text{M}+\text{H}]^+$  Calcd for  $\text{C}_{17}\text{H}_{15}\text{F}_3\text{NO}$ : 306.1100; Found: 306.1110.



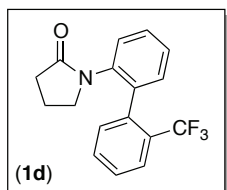

**Pyrrolidinone 1d.** The general procedure was followed utilizing substrate **1** (40.3 mg, 0.25 mmol, 1.0 equiv), [(*o*-CF<sub>3</sub>C<sub>6</sub>H<sub>4</sub>)<sub>2</sub>I]BF<sub>4</sub> (252 mg, 0.50 mmol, 2 equiv), Ir(ppy)<sub>2</sub>(dtbbpy)PF<sub>6</sub> (11.4 mg, 0.0125 mmol, 0.05 equiv), Pd(NO<sub>3</sub>)<sub>2</sub>•2H<sub>2</sub>O (6.7 mg, 0.025 mmol, 0.10 equiv), and MeOH (1.25 mL). Product **1d** was obtained as a white solid (35.0 mg, 46% yield, R<sub>f</sub> = 0.13 in 20% hexanes/80% Et<sub>2</sub>O, mp = 61.8–63.9 °C). <sup>1</sup>H NMR (700 MHz, CDCl<sub>3</sub>): δ 7.76 (d, *J* = 7.7 Hz, 1H), 7.54 (t, *J* = 7.7 Hz, 1H), 7.49 (t, *J* = 7.7 Hz, 1H), 7.46 (td, *J* = 7.7, 1.4 Hz, 1H), 7.41 (d, *J* = 7.7 Hz, 1H), 7.36 (td, *J* = 7.4, 1.4 Hz, 1H), 7.33–7.32 (multiple peaks, 2H), 3.36 (ddd, *J* = 14.0, 7.7, 5.6 Hz, 1H), 3.03 (ddd, *J* = 14.0, 8.4, 5.6 Hz, 1H), 2.40 (ddd, *J* = 16.4, 9.1, 6.3 Hz, 1H), 2.22 (ddd, *J* = 16.4, 9.1, 6.3 Hz, 1H), 1.94 (m, 1H), 1.67 (m, 1H). <sup>13</sup>C {<sup>1</sup>H} NMR (176 MHz, CDCl<sub>3</sub>): δ 175.57, 137.43, 136.99, 136.76, 132.08, 131.25, 131.05 (q, *J*<sub>C-F</sub> = 2.1 Hz), 129.25, 128.28 (q, *J*<sub>C-F</sub> = 30 Hz), 128.08, 127.96, 127.17, 126.21 (q, *J*<sub>C-F</sub> = 5.3 Hz), 124.06 (q, *J*<sub>C-F</sub> = 274 Hz), 49.90, 30.98, 19.05. <sup>19</sup>F NMR (376 MHz, CDCl<sub>3</sub>): δ -57.09 (s). IR (thin film, CDCl<sub>3</sub>) 2920, 1697, 1313, 1111 cm<sup>-1</sup>. HRMS [M+H]<sup>+</sup> Calcd for C<sub>17</sub>H<sub>15</sub>F<sub>3</sub>NO: 306.1100; Found: 306.1112.

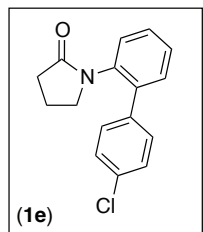

**Pyrrolidinone 1e.** The general procedure was followed utilizing substrate **1** (80.6 mg, 0.50 mmol, 1.0 equiv), [(*p*-ClC<sub>6</sub>H<sub>4</sub>)<sub>2</sub>I]BF<sub>4</sub> (437 mg, 1.00 mmol, 2 equiv), Ir(ppy)<sub>2</sub>(dtbbpy)PF<sub>6</sub> (22.8 mg, 0.025 mmol, 0.05 equiv), Pd(NO<sub>3</sub>)<sub>2</sub>•2H<sub>2</sub>O (13.3 mg, 0.050 mmol, 0.10 equiv), and MeOH (2.5 mL). Product **1e** was obtained as a tan solid [104 mg, 77% yield, R<sub>f</sub> = 0.13 in 20% hexanes/80% Et<sub>2</sub>O, mp = 95.6–97.4 °C (lit. 93.9–96.0 °C)].<sup>9</sup> <sup>1</sup>H and <sup>13</sup>C NMR data matched those reported in the literature.<sup>9</sup>

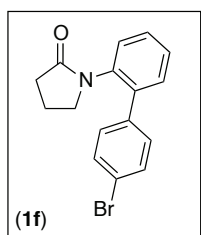

**Pyrrolidinone 1f.** The general procedure was followed utilizing substrate **1** (80.6 mg, 0.50 mmol, 1.0 equiv), [(*p*-BrC<sub>6</sub>H<sub>4</sub>)<sub>2</sub>I]BF<sub>4</sub> (526 mg, 1.00 mmol, 2 equiv), Ir(ppy)<sub>2</sub>(dtbbpy)PF<sub>6</sub> (22.8 mg, 0.025 mmol, 0.05 equiv), Pd(NO<sub>3</sub>)<sub>2</sub>•2H<sub>2</sub>O (13.3 mg, 0.050 mmol, 0.10 equiv), and MeOH (2.5 mL). Product **1f** was obtained as a pale yellow oil (125 mg, 79% yield, R<sub>f</sub> = 0.13 in 20% hexanes/80% Et<sub>2</sub>O). <sup>1</sup>H NMR (500 MHz, CDCl<sub>3</sub>): δ 7.54 (d, *J* = 8.5 Hz, 2H), 7.44–7.35 (multiple peaks, 3H) 7.33 (d, *J* = 7.5 Hz, 1H), 7.27 (d, *J* = 8.5 Hz, 2H), 3.27 (t, *J* = 7.0 Hz, 2H), 2.44 (t, *J* = 8.0 Hz, 2H), 1.93 (tt, *J* = 8.0, 7.0 Hz, 2H). <sup>13</sup>C {<sup>1</sup>H} NMR (126 MHz, CDCl<sub>3</sub>): δ 175.61, 138.48, 138.01, 136.18, 131.56, 130.61, 130.00, 128.95, 128.40, 128.18, 121.87, 50.26, 31.09, 18.94. IR (thin film, neat) 2879, 1680, 1402 cm<sup>-1</sup>. HRMS [M+H]<sup>+</sup> Calcd for C<sub>16</sub>H<sub>15</sub>BrNO: 316.0332; Found: 316.0340.

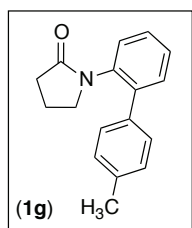

**Pyrrolidinone 1g.** The general procedure was followed utilizing substrate **1** (80.6 mg, 0.50 mmol, 1.0 equiv), [*p*-MeC<sub>6</sub>H<sub>4</sub>]<sub>2</sub>I]BF<sub>4</sub> (396 mg, 1.00 mmol, 2 equiv), Ir(ppy)<sub>2</sub>(dtbbpy)PF<sub>6</sub> (22.8 mg, 0.025 mmol, 0.05 equiv), Pd(NO<sub>3</sub>)<sub>2</sub>•2H<sub>2</sub>O (13.3 mg, 0.050 mmol, 0.10 equiv), and MeOH (2.5 mL). Product **1g** was obtained as a tan solid (109.8 mg, 87% yield, R<sub>f</sub> = 0.17 in 20% hexanes/80% Et<sub>2</sub>O, mp = 78.6-80.4 °C). <sup>1</sup>H NMR (700 MHz, CDCl<sub>3</sub>): δ 7.40-7.35 (multiple peaks, 3H), 7.31 (d, *J* = 7.3 Hz, 1H), 7.27 (d, *J* = 8.0 Hz, 2H), 7.20 (d, *J* = 8.0 Hz, 2H), 3.22 (t, *J* = 6.9 Hz, 2H), 2.43 (t, *J* = 8.0 Hz, 2H), 2.39 (s, 3H), 1.88 (tt, *J* = 8.0, 6.9 Hz, 2H). <sup>13</sup>C{<sup>1</sup>H} NMR (176 MHz, CDCl<sub>3</sub>): δ 175.61, 139.52, 137.28, 136.27, 136.16, 130.86, 129.12, 128.34, 128.30, 128.18, 127.98, 50.06, 31.20, 21.18, 18.97. IR (thin film, CDCl<sub>3</sub>) 3026, 2920, 1694, 1487, 1407, 1301 cm<sup>-1</sup>. HRMS [M+H]<sup>+</sup> Calcd for C<sub>17</sub>H<sub>18</sub>NO: 252.1383; Found: 252.1391.

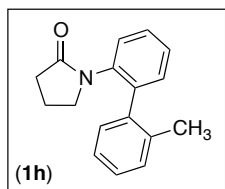

**Pyrrolidinone 1h.** The general procedure was followed utilizing substrate **1** (80.6 mg, 0.50 mmol, 1.0 equiv), [(*o*-MeC<sub>6</sub>H<sub>4</sub>)<sub>2</sub>I]BF<sub>4</sub> (396 mg, 1.00 mmol, 2 equiv), Ir(ppy)<sub>2</sub>(dtbbpy)PF<sub>6</sub> (22.8 mg, 0.025 mmol, 0.05 equiv), Pd(NO<sub>3</sub>)<sub>2</sub>•2H<sub>2</sub>O (13.3 mg, 0.050 mmol, 0.10 equiv), and MeOH (2.5 mL). Product **1h** was obtained as a pale yellow oil (107 mg, 85% yield, R<sub>f</sub> = 0.20 in 20% hexanes/80% Et<sub>2</sub>O). NMR (500 MHz, CDCl<sub>3</sub>): δ 7.40 (ddd, *J* = 7.7, 7.0, 1.4 Hz, 1H), 7.36 (dd, *J* = 8.4, 1.4 Hz, 1H), 7.34 (td, *J* = 7.7, 1.4 Hz, 1H), 7.27-7.24 (multiple peaks, 3H), 7.19 (m, 1H), 7.16 (d, 7.0 Hz, 1H), 3.23 (ddd, *J* = 9.1, 8.4, 5.6 Hz, 1H), 3.09 (ddd, *J* = 9.1, 7.7, 5.6 Hz, 1H), 2.32 (m, 2H), 2.15 (s, 3H), 1.82 (m, 1H), 1.75 (m, 1H). <sup>13</sup>C{<sup>1</sup>H} NMR (126 MHz, CDCl<sub>3</sub>): δ 175.10, 138.89, 138.60, 136.96, 135.88, 131.11, 130.13, 129.39, 128.3, 128.1, 127.72, 127.29, 125.47, 49.94, 31.15, 19.93, 19.02. IR (thin film, neat) 2952, 1696, 1398 cm<sup>-1</sup>. HRMS [M+H]<sup>+</sup> Calcd for C<sub>17</sub>H<sub>18</sub>NO: 252.1383; Found: 252.1392.

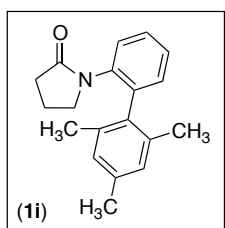

**Pyrrolidinone 1i.** The general procedure was followed utilizing substrate **1** (40.3 mg, 0.25 mmol, 1.0 equiv), [Mes<sub>2</sub>I]OTf (257 mg, 0.50 mmol, 2 equiv), Ir(ppy)<sub>2</sub>(dtbbpy)PF<sub>6</sub> (11.3 mg, 0.0125 mmol, 0.05 equiv), Pd(NO<sub>3</sub>)<sub>2</sub>•2H<sub>2</sub>O (6.7 mg, 0.025 mmol, 0.10 equiv), and MeOH (1.25 mL). Product **1i** was obtained as a white solid (8 mg, 11% yield, R<sub>f</sub> = 0.17 in 96% CH<sub>2</sub>Cl<sub>2</sub>/4% Et<sub>2</sub>O, mp = 121.2-123.8 °C). <sup>1</sup>H NMR (700 MHz, CDCl<sub>3</sub>): δ 7.44-7.39 (multiple peaks, 2H), 7.34 (td, *J* = 7.5, 1.5 Hz, 1H), 7.13 (dd, *J* = 7.5, 1.2 Hz, 1H), 6.92 (s, 2H), 3.12 (t, *J* = 6.9 Hz, 2H), 2.36 (t, *J* = 8.0 Hz, 2H), 2.34 (s, 3H), 1.98 (s, 6H), 1.80 (tt, *J* = 8.0, 6.9 Hz, 2H). <sup>13</sup>C{<sup>1</sup>H} NMR (176 MHz, CDCl<sub>3</sub>): δ 174.82, 137.32, 137.16, 137.01, 136.23, 135.62, 131.27, 128.25, 128.06, 127.97, 127.33, 49.16, 31.35,

21.06, 20.41, 19.07. IR (thin film, CH<sub>2</sub>Cl<sub>2</sub>) 2918, 1699, 1398, 1301 cm<sup>-1</sup>. HRMS [M+H]<sup>+</sup> Calcd for C<sub>19</sub>H<sub>22</sub>NO: 280.1699; Found: 280.1705.

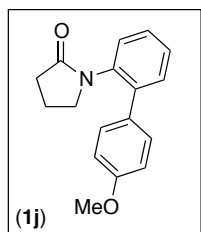

**Pyrrolidinone 1j.** The general procedure was followed utilizing substrate **1** (80.6 mg, 0.50 mmol, 1.0 equiv), [(*p*-OMeC<sub>6</sub>H<sub>4</sub>)<sub>2</sub>I]BF<sub>4</sub> (428 mg, 1.00 mmol, 2 equiv), Ir(ppy)<sub>2</sub>(dtbbpy)PF<sub>6</sub> (22.8 mg, 0.025 mmol, 0.05 equiv), Pd(NO<sub>3</sub>)<sub>2</sub>•2H<sub>2</sub>O (13.3 mg, 0.050 mmol, 0.10 equiv), and MeOH (2.5 mL). Product **1j** was obtained as a tan viscous oil (54.3 mg, 41% yield, R<sub>f</sub> = 0.07 in 20% hexanes/80% Et<sub>2</sub>O). <sup>1</sup>H and <sup>13</sup>C NMR data matched those reported in the literature.<sup>9</sup>

#### IV. Experimental Details for Table 4

**Radical/Photocatalytic Procedure for Reactions in Table 4 (entries 1–5):** Substrate **8** (8.5 mg, 0.050 mmol, 1 equiv), [Ph<sub>2</sub>I]BF<sub>4</sub> (36.8 mg, 0.100 mmol, 2 equiv), Ir(ppy)<sub>2</sub>(dtbbpy)PF<sub>6</sub> (2.3 mg, 0.0025 mmol, 0.05 equiv), Pd(NO<sub>3</sub>)<sub>2</sub>•2H<sub>2</sub>O (1.3 mg, 0.005 mmol, 0.10 equiv), and galvinoxyl (0, 2.1, or 5.3 mg; 0, 0.005, or 0.0125 mmol; 0, 0.10, or 0.25 equiv) or TEMPO (0, 3.9, or 7.8 mg; 0, 0.025, or 0.050 mmol; 0, 0.50, or 1.0 equiv) were combined in MeOH (0.25 mL) in a 4 mL scintillation vial. The reaction mixture was cooled in an ice bath (to prevent evaporation) and sparged with N<sub>2</sub> using a submerged needle for 1 min, and the vial was then immediately sealed with a Teflon-lined cap. The vial was placed on a stir plate with two 26 W compact fluorescent light bulbs (one on either side of the vial about 5–8 cm away), and the reaction mixture was allowed to stir at room temperature for 15 h. Reactions were then quenched with 10% aqueous Na<sub>2</sub>SO<sub>3</sub> (0.25 mL), diluted with EtOAc (3.5 mL), and analyzed by GC-FID. GC calibrated yields are reported relative to hexadecane as an internal standard. The yields reported in Table 4 are the averages of three separate trials.

**Ionic/Thermal Procedure for Reactions in Table 4 (entries 6–9).** Substrate **8** (8.5 mg, 0.050 mmol, 1 equiv), [Ph<sub>2</sub>I]BF<sub>4</sub> (20.2 mg, 0.055 mmol, 1.1 equiv), Pd(OAc)<sub>2</sub> (1.1 mg, 0.005 mmol, 0.10 equiv), and galvinoxyl (0 or 5.3 mg; 0 or 0.0125 mmol; 0 or 0.25 equiv) or TEMPO (0 or 7.8 mg; 0 or 0.050 mmol; 0 or 1.0 equiv) were combined in AcOH (0.42 mL) in a 4 mL scintillation vial. The reaction was heated to 100 °C for 15 h, then quenched with 10% aqueous Na<sub>2</sub>SO<sub>3</sub> (0.25 mL), diluted with EtOAc (3.5 mL), and analyzed by GC-FID. GC calibrated yields are reported relative to hexadecane as an internal standard. The yields reported in Table 4 are the averages of three separate trials. These conditions are similar to those reported previously for 2-arylpyridine substrates;<sup>11</sup> however, the catalyst loading was increased to 10% (instead of 5%) to more closely resemble the conditions of the photocatalytic/radical trials.

## V. Experimental Details for Equation 1

**Radical/Photocatalytic Procedure for Reaction in Equation 1.** Substrate **1** (8.1 mg, 0.050 mmol, 1 equiv), [(*o*-CF<sub>3</sub>C<sub>6</sub>H<sub>4</sub>)-I-Ph]BF<sub>4</sub> (43.6 mg, 0.100 mmol, 2 equiv), Ir(ppy)<sub>2</sub>(dtbbpy)PF<sub>6</sub> (2.3 mg, 0.0025 mmol, 0.05 equiv), and Pd(NO<sub>3</sub>)<sub>2</sub>•2H<sub>2</sub>O (1.3 mg, 0.005 mmol, 0.10 equiv) were combined in MeOH (0.25 mL) in a 4 mL scintillation vial. The reaction mixture was cooled in an ice bath (to prevent evaporation) and sparged with N<sub>2</sub> using a submerged needle for 1 min, and the vial was then immediately sealed with a Teflon-lined cap. The vial was placed on a stir plate with two 26 W compact fluorescent light bulbs (one on either side of the vial about 5–8 cm away), and the reaction mixture was allowed to stir at room temperature for 15 h. Reactions were then quenched with 10% aq. Na<sub>2</sub>SO<sub>3</sub> (0.25 mL), diluted with EtOAc (3.5 mL), and analyzed by GC-FID. GC calibrated yields are reported relative to hexadecane as an internal standard.

**Ionic/Thermal Procedure for Reaction in Equation 1.** Substrate **1** (8.1 mg, 0.050 mmol, 1 equiv), [(*o*-CF<sub>3</sub>C<sub>6</sub>H<sub>4</sub>)-I-Ph]BF<sub>4</sub> (43.6 mg, 0.100 mmol, 2 equiv), Pd(OAc)<sub>2</sub> (1.1 mg, 0.005 mmol, 0.10 equiv), and NaHCO<sub>3</sub> (6.3 mg, 0.075 mmol, 1.5 equiv) were combined in toluene (0.42 mL). The reaction was heated to 100 °C for 15 h, then quenched with 10% aq. Na<sub>2</sub>SO<sub>3</sub> (0.25 mL), diluted with EtOAc (3.5 mL), and analyzed by GC-FID. GC calibrated yields are reported relative to hexadecane as an internal standard. These conditions are similar to the conditions reported previously for substrate **1**;<sup>11</sup> however, the equivalents of oxidant were increased to 2 (instead of 1.5) and the catalyst loading was increased to 10% (instead of 5%) to more closely resemble the conditions of the photocatalytic/radical trials.

## VI. Experimental Details for Table 5

**PhN<sub>2</sub><sup>+</sup> procedure.**<sup>9</sup> Substrate (0.050 mmol, 1 equiv), Pd(OAc)<sub>2</sub> (1.1 mg, 0.005 mmol, 0.10 equiv), Ru(bpy)<sub>3</sub>Cl<sub>2</sub>•6H<sub>2</sub>O (0.94 mg, 0.00125 mmol, 0.025 equiv), and [PhN<sub>2</sub>]BF<sub>4</sub> (38.4 mg, 0.200 mmol, 4 equiv) were combined in MeOH (500 μL) in a 4 mL scintillation vial. The reaction mixture was cooled in an ice bath (to prevent evaporation) and sparged with N<sub>2</sub> using a submerged needle for 1 min, and the vial was then immediately sealed with a Teflon-lined cap. The vial was placed on a stir plate with two 26 W compact fluorescent light bulbs (one on either side of the vial about 5–8 cm away), and the reaction mixture was allowed to stir at room temperature for 15 h. Reactions were then quenched with 10% aq. Na<sub>2</sub>SO<sub>3</sub> (0.25 mL), diluted with EtOAc (3.5 mL), and analyzed by GC-FID. GC calibrated yields are reported relative to hexadecane as an internal standard.

**Ph<sub>2</sub>I<sup>+</sup> procedure.** GC calibrated yields were obtained from the reactions described in Section II and are reported relative to hexadecane as an internal standard.

## VII. References

1. Shakespeare, W. C. *Tetrahedron Lett.* **1999**, *40*, 2035.
2. Stowers K. J.; Sanford, M. S. *Org. Lett.* **2009**, *11*, 4584.
3. Neufeldt, S. R.; Sanford, M. S. *Org. Lett.* **2010**, *12*, 532.
4. Chen, D. W.; Ochiai, M. J. *Org. Chem.* **1999**, *64*, 6804.
5. Bielawski, M.; Olofsson, B. *Chem. Commun.* **2007**, 2521.
6. Bielawski, M.; Aili, D.; Olofsson, B. *J. Org. Chem.* **2008**, *73*, 4602.
7. Stoessel, P.; Fortte, R.; Parham, A.; Breuning, E.; Heil, H.; Vestweber, H. U.S. Patent 20080312396A1, December 18, 2008.
8. Slinker, J. D.; Gorodetsky, A. A.; Lowry, M. S.; Wang, J.; Parker, S.; Rohl, R.; Bernhard, S.; Malliaras, G. G. *J. Am. Chem. Soc.* **2004**, *126*, 2763.
9. Kalyani, D.; McMurtrey, K. B.; Neufeldt, S. R.; Sanford, M. S. *J. Am. Chem. Soc.* **2011**, *133*, 18566.
10. Daugulis, O.; Zaitsev, V. *Angew. Chem. Int. Ed.* **2005**, *44*, 4046.
11. Kalyani, D.; Deprez, N. R.; Desai, L. V.; Sanford, M. S. *J. Am. Chem. Soc.* **2005**, *127*, 7330.

10SRN111\_1H

Sample Name:

Data Collected on:  
Yb-vnmrs700

Archive directory:

Sample directory:

FidFile: 10SRN111\_1H

Pulse Sequence: PROTON (s2pul)  
Solvent: cdcl3  
Data collected on: May 27 2012

Temp. 25.0 C / 298.1 K  
Operator: sharose

Relax. delay 0.500 sec  
Pulse 45.0 degrees  
Acq. time 3.500 sec  
Width 11160.7 Hz  
8 repetitions  
OBSERVE H1, 699.7567663 MHz  
DATA PROCESSING  
Line broadening 0.3 Hz  
FT size 131072  
Total time 0 min 40 sec

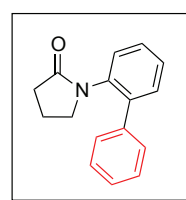

Agilent Technologies

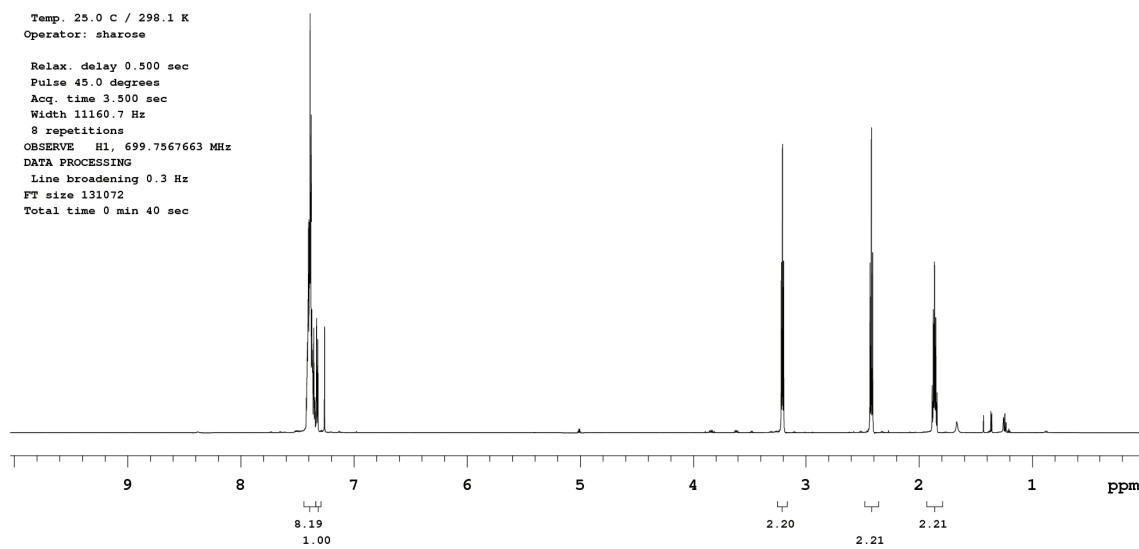



10SRN111\_13C

Sample Name:

Data Collected on:  
Yb-vnmrs700

Archive directory:

Sample directory:

FidFile: 10SRN111\_13C

Pulse Sequence: CARBON (s2pul)  
Solvent: cdcl3  
Data collected on: May 27 2012

Temp. 25.0 C / 298.1 K  
Operator: sharose

Relax. delay 0.100 sec  
Pulse 45.0 degrees  
Acq. time 1.468 sec  
Width 44642.9 Hz  
224 repetitions  
OBSERVE C13, 175.9539830 MHz  
DECOUPLE H1, 699.7602734 MHz  
Power 39 dB  
continuously on  
WALTZ-16 modulated  
DATA PROCESSING  
Line broadening 1.0 Hz  
FT size 131072  
Total time 5 min 51 sec

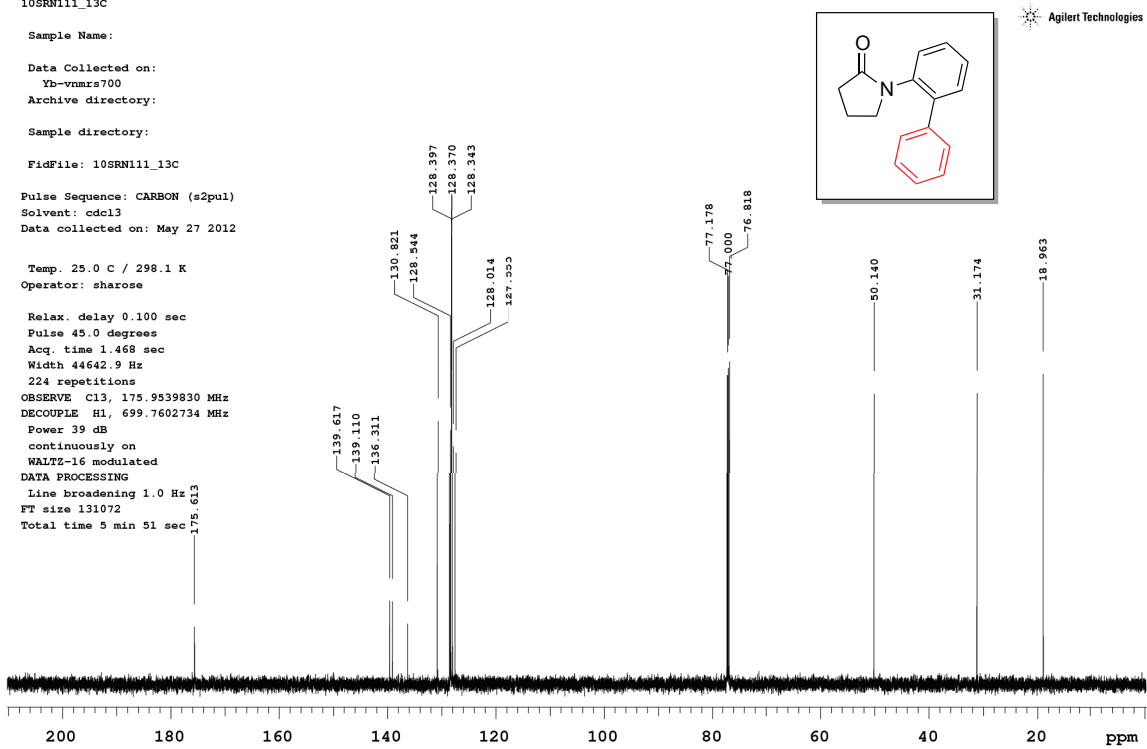

Agilent Technologies

10SRN9\_1H\_500

Sample Name:

Data Collected on:  
Te-vnmrs500

Archive directory:

Sample directory:

FidFile: 10SRN9\_1H\_500

Pulse Sequence: PROTON (s2pul)  
Solvent: cdcl3  
Data collected on: May 12 2012

Operator: sharose

Relax. delay 0.500 sec  
Pulse 45.0 degrees  
Acq. time 3.500 sec  
Width 8012.8 Hz  
8 repetitions  
OBSERVE H1, 500.0931670 MHz  
DATA PROCESSING  
Line broadening 0.3 Hz  
FT size 65536  
Total time 0 min 40 sec

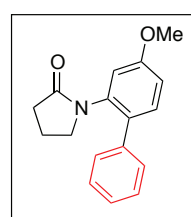

Agilent Technologies

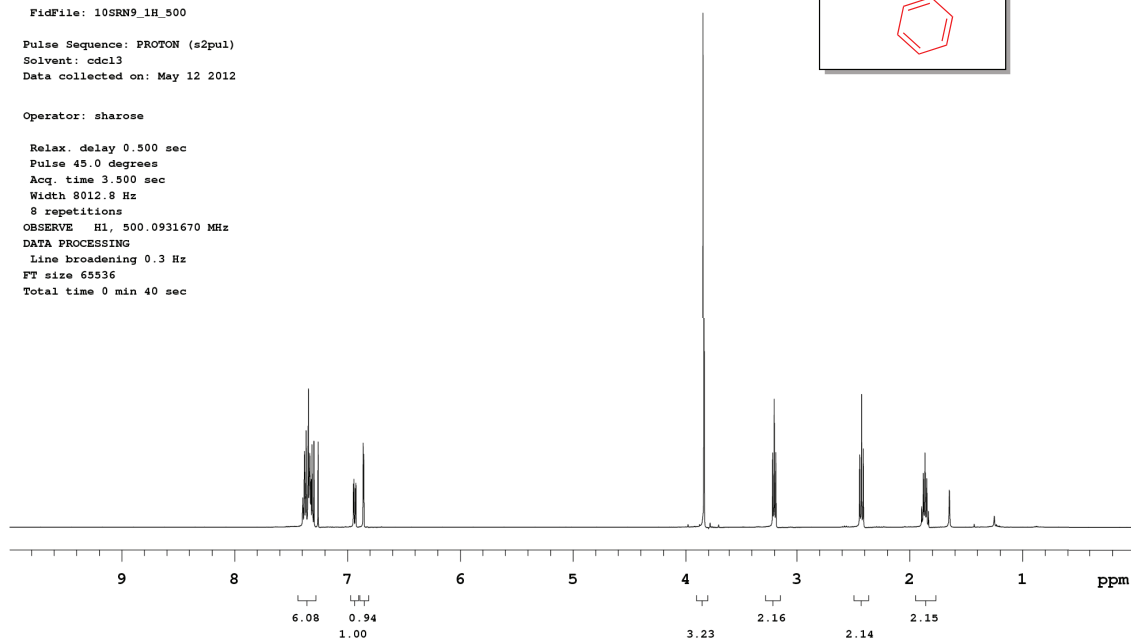

10SRN9\_13C

Sample Name:

Data Collected on:  
Te-vnmrs500

Archive directory:

Sample directory:

FidFile: 10SRN9\_13C

Pulse Sequence: CARBON (s2pul)  
Solvent: cdcl3  
Data collected on: May 12 2012

Operator: sharose

Relax. delay 0.100 sec  
Pulse 45.0 degrees  
Acq. time 1.049 sec  
Width 31250.0 Hz  
1296 repetitions  
OBSERVE C13, 125.7485308 MHz  
DECOUPLE H1, 500.0956704 MHz  
Power 41 dB  
continuously on  
WALTZ-16 modulated  
DATA PROCESSING  
Line broadening 1.0 Hz  
FT size 65536  
Total time 24 min

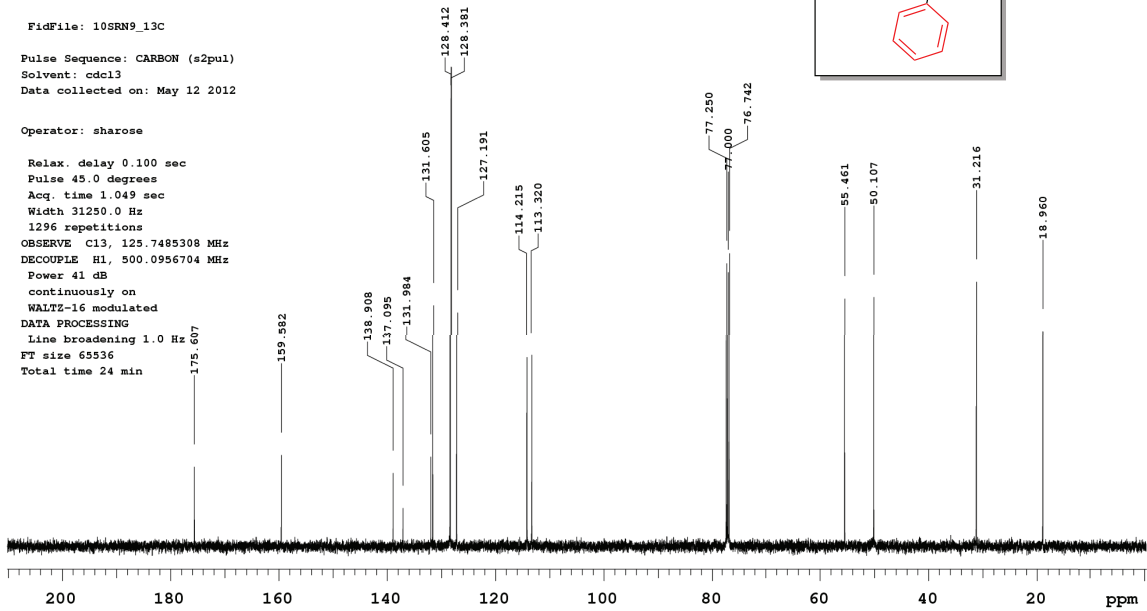

10SRN75\_1H\_MeCN

Sample Name:

Data Collected on:

Yb-vnmrs700

Archive directory:

Sample directory:

FidFile: 10SRN75\_1H\_MeCN

Pulse Sequence: PROTON (s2pul)

Solvent: cd3cn

Data collected on: Jun 4 2012

Temp. 25.0 C / 298.1 K  
Operator: sharose

Relax. delay 0.500 sec

Pulse 45.0 degrees

Acq. time 3.500 sec

Width 11160.7 Hz

8 repetitions

OBSERVE H1, 699.7604859 MHz

DATA PROCESSING

Line broadening 0.3 Hz

FT size 131072

Total time 0 min 40 sec

Agilent Technologies

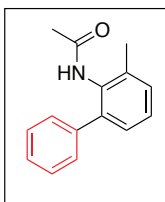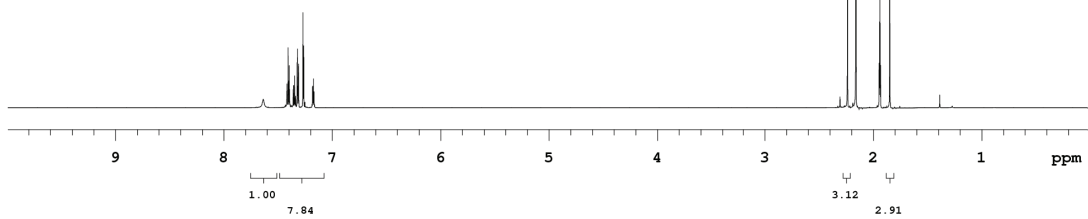

10SRN75\_13C\_MeCN

Sample Name:

Data Collected on:

Yb-vmas700

Archive directory:

Sample directory:

FidFile: 10SRN75\_13C\_MeCN

Pulse Sequence: CARBON (s2pul)

Solvent: c6d6

Data collected on: Jun 4 2012

Temp. 25.0 C / 298.1 K

Operator: sharose

Relax. delay 0.100 sec

Pulse 45.0 degrees

Acq. time 1.468 sec

Width 44642.9 Hz

2912 repetitions

OBSERVE C13, 175.9547449 MHz

DECOUPLE H1, 699.7603364 MHz

Power 39 dB

continuously on

WALTZ-16 modulated

DATA PROCESSING

Line broadening 1.0 Hz

FT size 131072

Total time 1 hr, 16 min

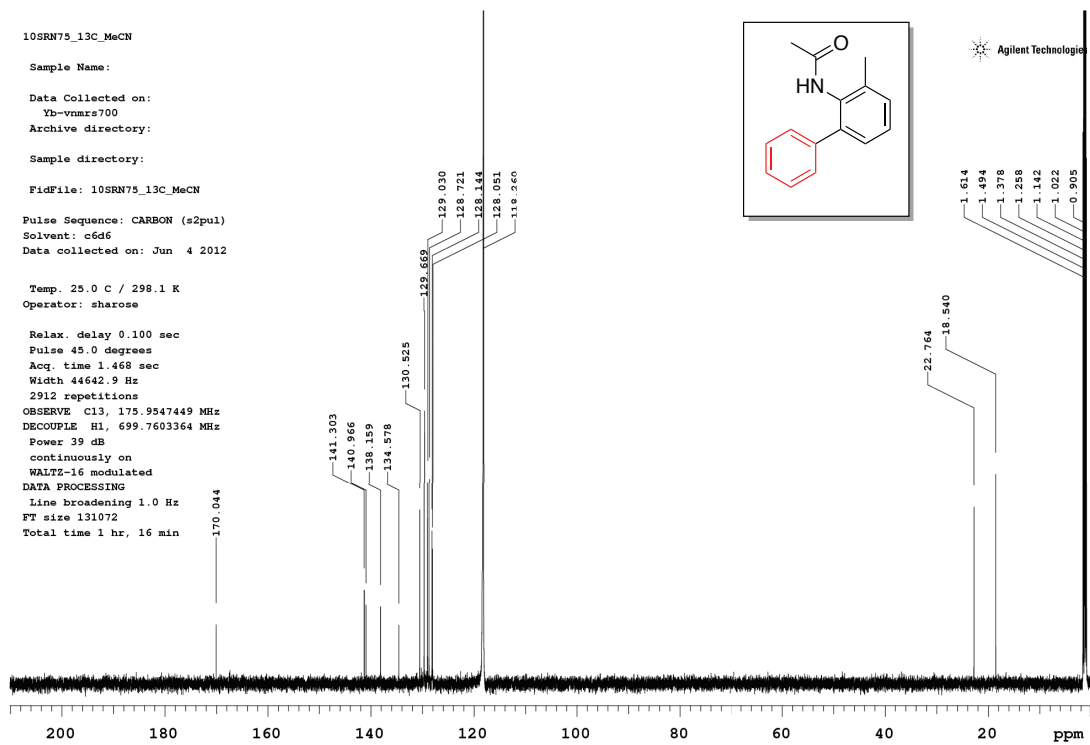

10SRN55\_1H\_clean

Sample Name:

Data Collected on:

Te-vnmrs500

Archive directory:

Sample directory:

FidFile: 10SRN55\_1H\_clean

Pulse Sequence: PROTON (s2pul)

Solvent: acetone

Data collected on: May 12 2012

Operator: sharose

Relax. delay 0.500 sec

Pulse 45.0 degrees

Acq. time 3.500 sec

Width 8012.8 Hz

16 repetitions

OBSERVE H1, 500.0957657 MHz

DATA PROCESSING

Line broadening 0.3 Hz

FT size 65536

Total time 1 min 12 sec

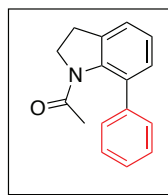

Agilent Technologies

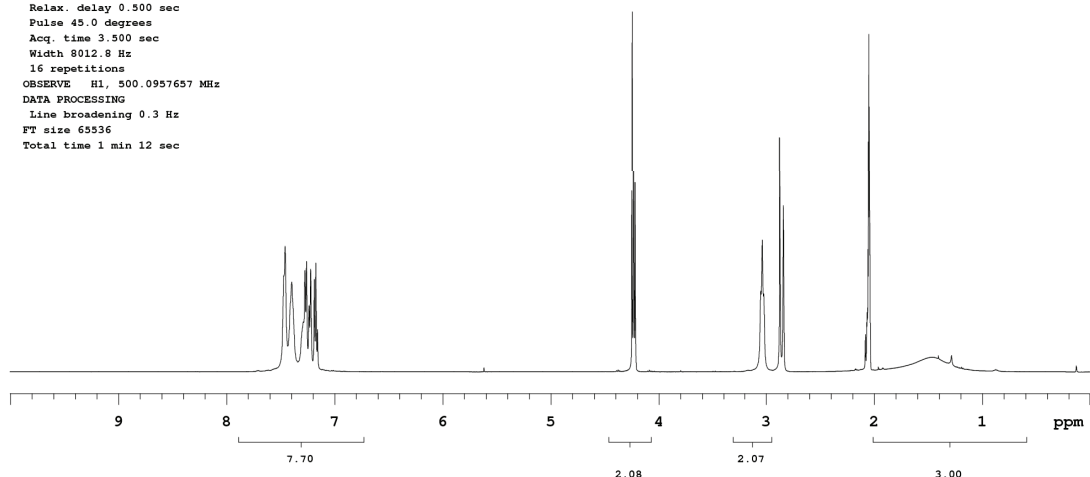

10SRN55\_13C\_acetone  
Sample Name:  
Data Collected on:  
Te-vnmrs500  
Archive directory:  
Sample directory:  
File: 10SRN55\_13C\_acetone  
Pulse Sequence: CARBON (s2pul)  
Solvent: acetone  
Data collected on: May 12 2012  
Operator: sharose  
Relax. delay 0.100 sec  
Pulse 45.0 degrees  
Acq. time 1.049 sec  
Width 31250.0 Hz  
2000 repetitions  
OBSERVE C13, 125.7490693 MHz  
DECUPLE H1, 500.0982659 MHz  
Power 41 dB  
continuously on  
WALTZ-16 modulated  
DATA PROCESSING  
Line broadening 1.0 Hz  
FT size 65536  
Total time 38 min

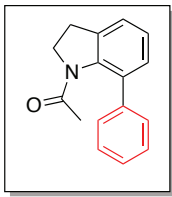

Agilent Technologies

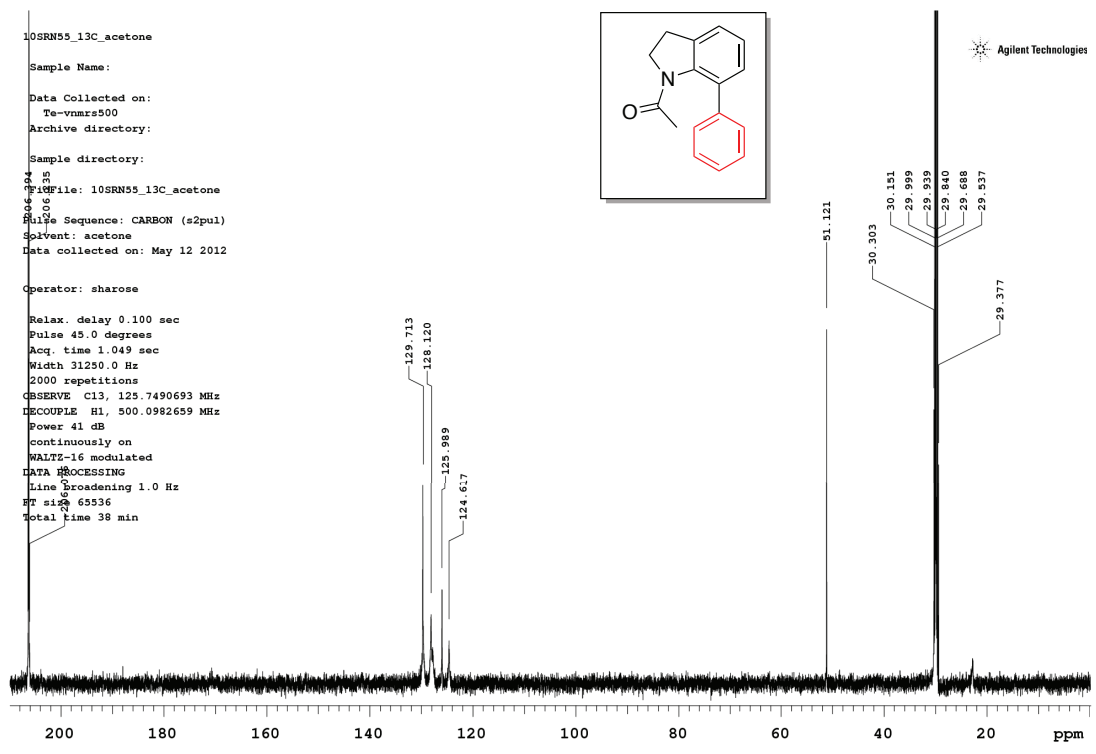

10SRN116\_1H

Sample Name:

Data Collected on:

Yb-vnmrs700

Archive directory:

Sample directory:

FidFile: 10SRN116\_1H

Pulse Sequence: PROTON (s2pul)

Solvent: cdc13

Data collected on: Jun 2 2012

Temp. 20.0 C / 293.1 K  
Operator: sharose

Relax. delay 0.500 sec

Pulse 45.0 degrees

Acq. time 3.500 sec

Width 11160.7 Hz

8 repetitions

OBSERVE H1, 699.7567661 MHz

DATA PROCESSING

Line broadening 0.3 Hz

FT size 131072

Total time 0 min 40 sec

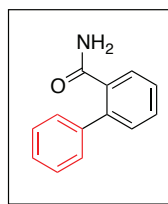

Agilent Technologies

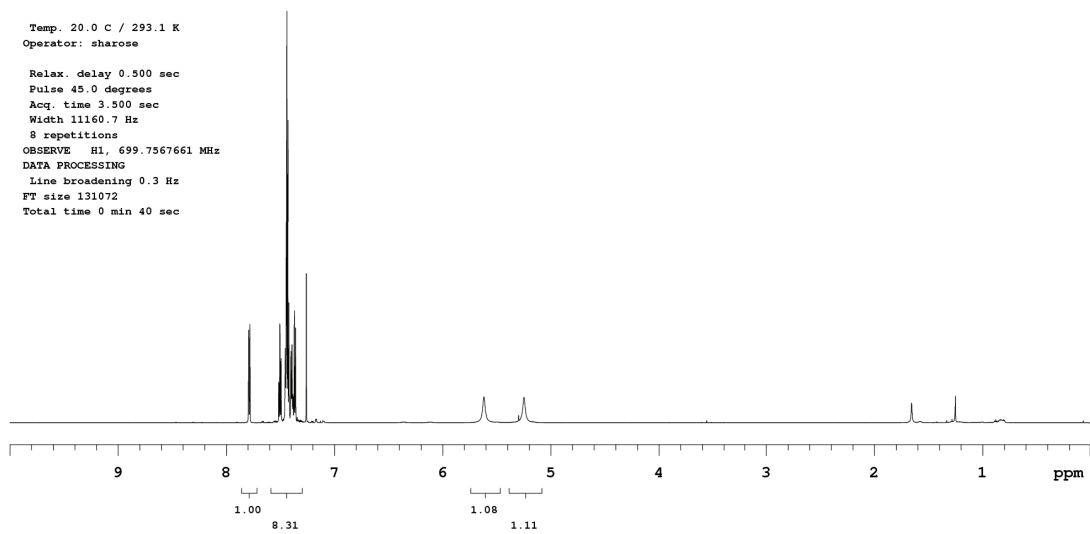



10SRN116\_13C

Sample Name:

Data Collected on:  
Yb-vmas700  
Archive directory:

Sample directory:

FidFile: 10SRN116\_13C

Pulse Sequence: CARBON (s2pul)  
Solvent: cdc13  
Data collected on: Jun 2 2012

Temp. 20.0 C / 293.1 K  
Operator: sharose

Relax. delay 0.100 sec  
Pulse 45.0 degrees  
Acq. time 1.468 sec  
Width 44642.9 Hz  
4528 repetitions  
OBSERVE C13, 175.9539830 MHz  
DECOUPLE H1, 699.7602734 MHz  
Power 39 dB  
continuously on  
WALTZ-16 modulated  
DATA PROCESSING  
Line broadening 1.0 Hz  
FT size 131072  
Total time 1 hr, 58 min

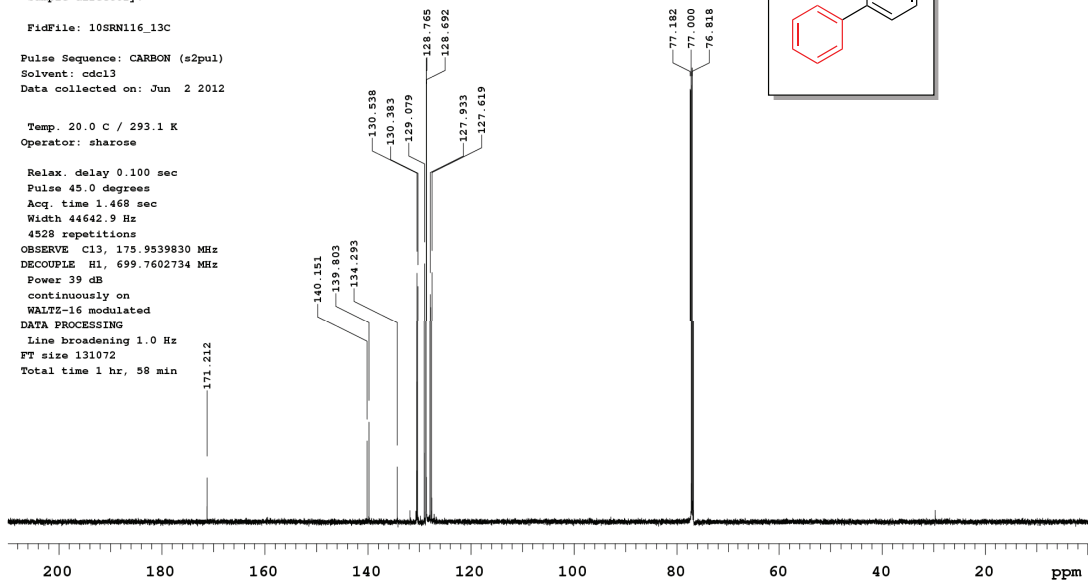

Agilent Technologies

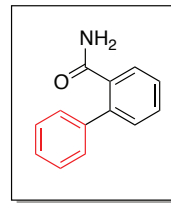

10SRN106\_1H

Sample Name:

Data Collected on:  
Ge.Chem.LSA.UMich.edu-vnmrs400  
Archive directory:

Sample directory:

FidFile: 10SRN106\_1H

Pulse Sequence: PROTON (s2pul)  
Solvent: cdc13  
Data collected on: May 25 2012

Operator: sharose

Relax. delay 0.500 sec  
Pulse 45.0 degrees  
Acq. time 3.500 sec  
Width 6377.6 Hz  
8 repetitions  
OBSERVE H1, 399.5337075 MHz  
DATA PROCESSING  
Line broadening 0.3 Hz  
FT size 65536  
Total time 0 min 40 sec

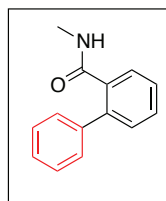

Agilent Technologies

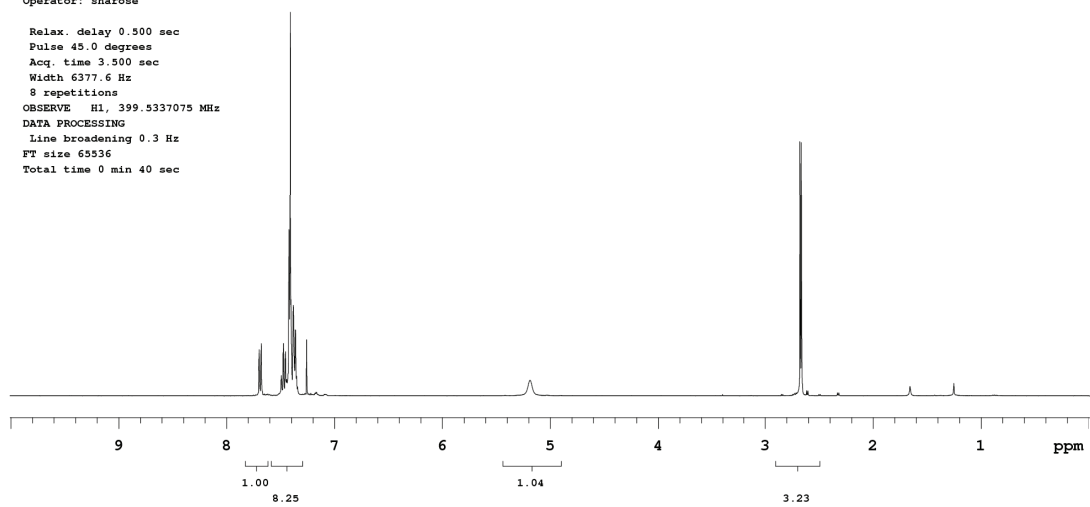

10SRN106\_13C

Sample Name:

Data Collected on:  
Ge.Chem.LSA.UMich.edu-vnmrs400  
Archive directory:

Sample directory:

FidFile: 10SRN106\_13C

Pulse Sequence: CARBON (s2pul)  
Solvent: cdc13  
Data collected on: May 25 2012

Operator: sharose

Relax. delay 0.100 sec  
Pulse 45.0 degrees  
Acq. time 2.621 sec  
Width 25000.0 Hz  
192 repetitions  
OBSERVE C13, 100.4628327 MHz  
DECOUPLE H1, 399.5357121 MHz  
Power 42 dB  
continuously on  
WALTZ-16 modulated  
DATA PROCESSING  
Line broadening 1.0 Hz  
FT size 131072  
Total time 8 min 42 sec

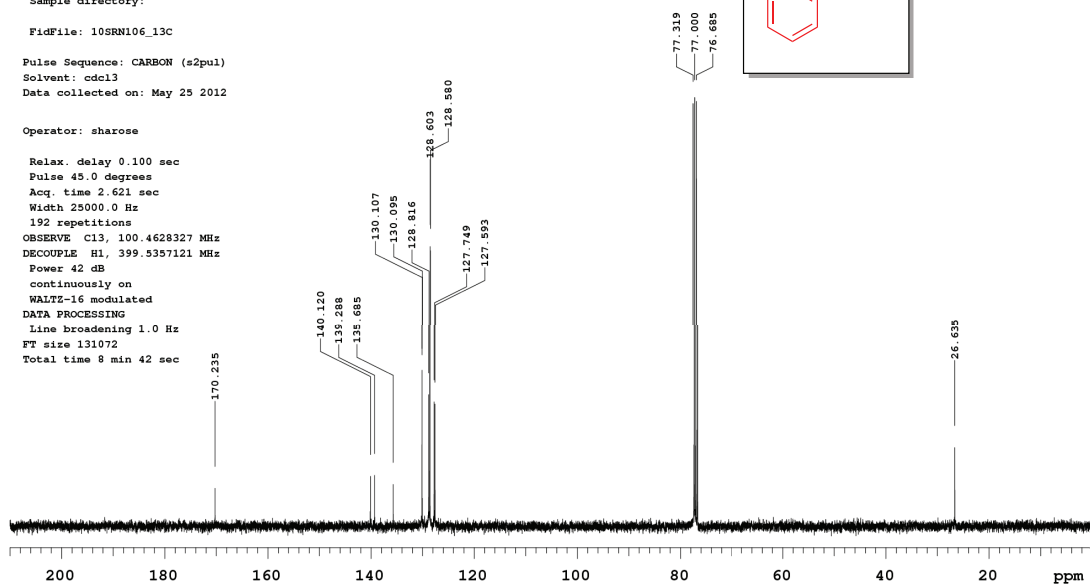

Agilent Technologies

10SRN107\_1H

Sample Name:

Data Collected on:  
Ge.Chem.LSA.UMich.edu-vnmrs400  
Archive directory:

Sample directory:

FidFile: 10SRN107\_1H

Pulse Sequence: PROTON (s2pul)  
Solvent: cdc13  
Data collected on: May 25 2012

Operator: sharose

Relax. delay 0.500 sec  
Pulse 45.0 degrees  
Acq. time 3.500 sec  
Width 6377.6 Hz  
8 repetitions  
OBSERVE H1, 399.5337065 MHz  
DATA PROCESSING  
Line broadening 0.3 Hz  
FT size 65536  
Total time 0 min 40 sec

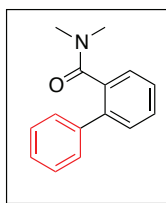

Agilent Technologies

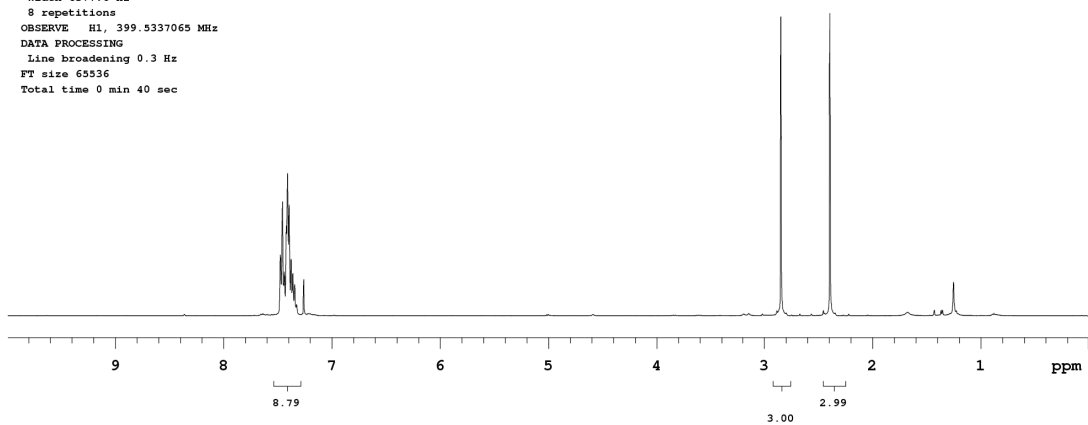

10SRN107\_13C

Sample Name:

Data Collected on:  
Ge.Chem.LSA.UMich.edu-vnmrs400  
Archive directory:

Sample directory:

FidFile: 10SRN107\_13C

Pulse Sequence: CARBON (s2pul)  
Solvent: cdc13  
Data collected on: May 25 2012

Operator: sharose

Relax. delay 0.100 sec  
Pulse 45.0 degrees  
Acq. time 2.621 sec  
Width 25000.0 Hz  
192 repetitions  
OBSERVE C13, 100.4628326 MHz  
DECOUPLE H1, 399.5357121 MHz  
Power 42 dB  
continuously on  
WALTZ-16 modulated  
DATA PROCESSING  
Line broadening 1.0 Hz  
FT size 131072  
Total time 8 min 42 sec

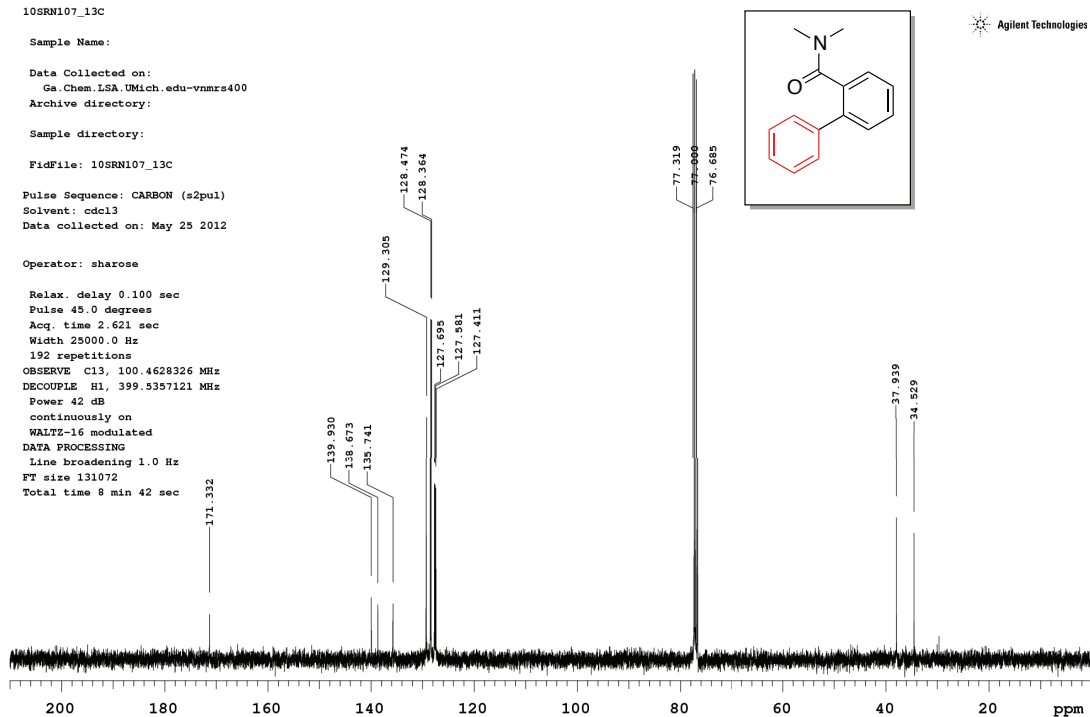

Agilent Technologies

10SRN94\_1H

Sample Name:

Data Collected on:

Yb-vnmrs700

Archive directory:

Sample directory:

FidFile: 10SRN94\_1H

Pulse Sequence: PROTON (s2pul)

Solvent: cdcl3

Data collected on: May 22 2012

Temp. 29.0 C / 298.1 K

Operator: sharose

Relax. delay 0.500 sec

Pulse 45.0 degrees

Acq. time 3.500 sec

Width 11160.7 Hz

8 repetitions

OBSERVE H1, 699.7567685 MHz

DATA PROCESSING

Line broadening 0.3 Hz

FT size 131072

Total time 0 min 40 sec

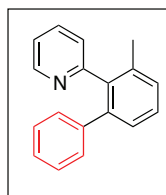

Agilent Technologies

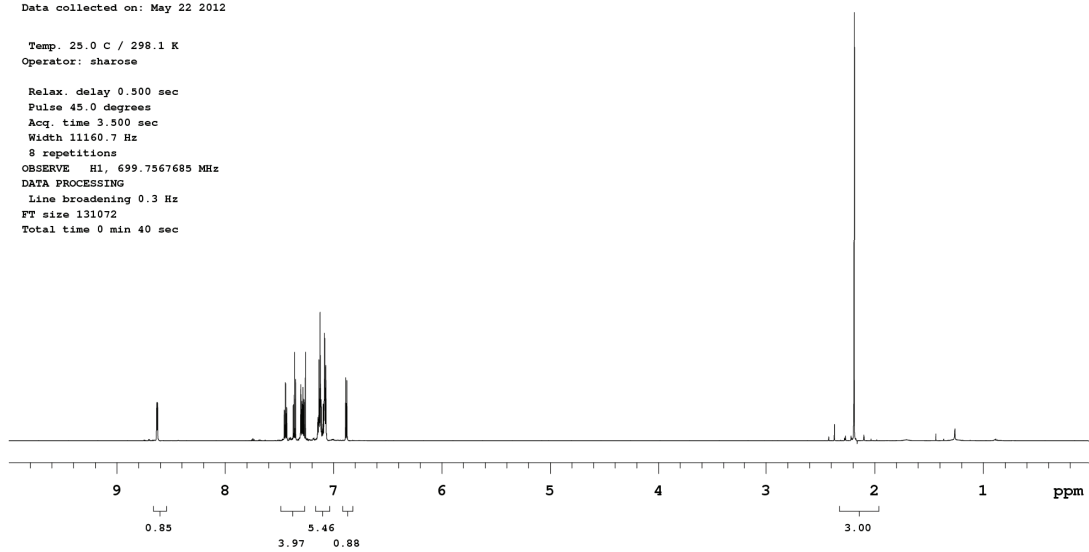

10SRN94\_13C

Sample Name:

Data Collected on:  
Yb-vnmrs700

Archive directory:

Sample directory:

FidFile: 10SRN94\_13C

Pulse Sequence: CARBON (s2pul)  
Solvent: cdc13  
Data collected on: May 22 2012

Temp. 25.0 C / 298.1 K  
Operator: sharose

Relax. delay 0.100 sec  
Pulse 45.0 degrees  
Acq. time 1.468 sec  
Width 44642.9 Hz  
176 repetitions

OBSERVE C13, 175.9539816 MHz  
DECOUPLE H1, 699.7602734 MHz  
Power 45 dB  
continuously on  
WALTZ-16 modulated  
DATA PROCESSING  
Line broadening 1.0 Hz  
FT size 131072  
Total time 4 min 35 sec

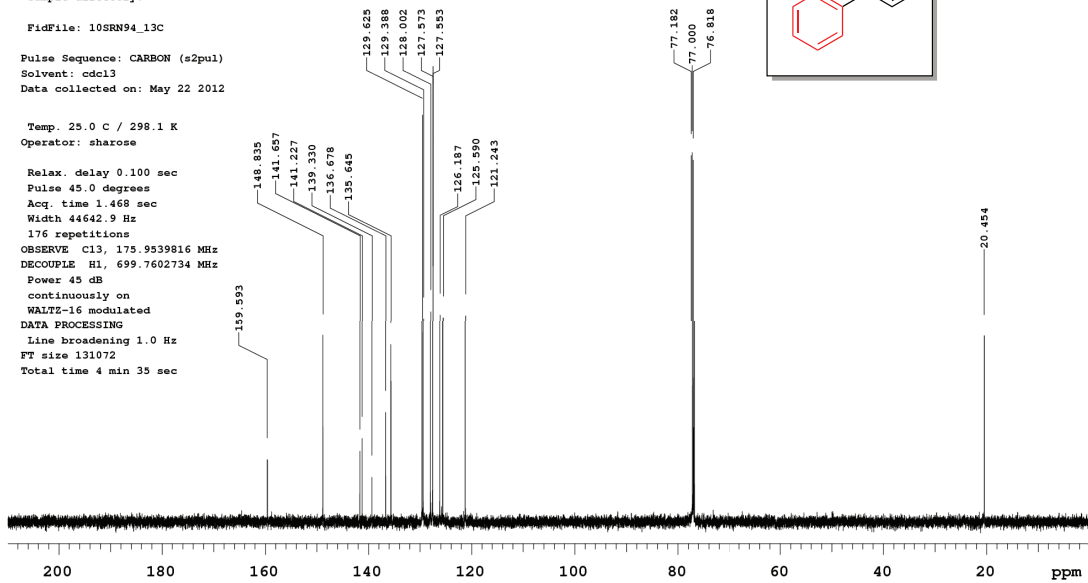

Agilent Technologies

10SRN95\_1H

Sample Name:

Data Collected on:

Yb-vnmrs700

Archive directory:

Sample directory:

FidFile: 10SRN95\_1H

Pulse Sequence: PROTON (s2pul)

Solvent: cdcl3

Data collected on: May 22 2012

Temp. 29.0 C / 298.1 K

Operator: sharose

Relax. delay 0.500 sec

Pulse 45.0 degrees

Acq. time 3.500 sec

Width 11160.7 Hz

8 repetitions

OBSERVE H1, 699.7567685 MHz

DATA PROCESSING

Line broadening 0.3 Hz

FT size 131072

Total time 0 min 40 sec

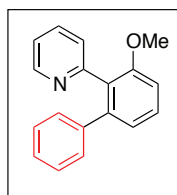

Agilent Technologies

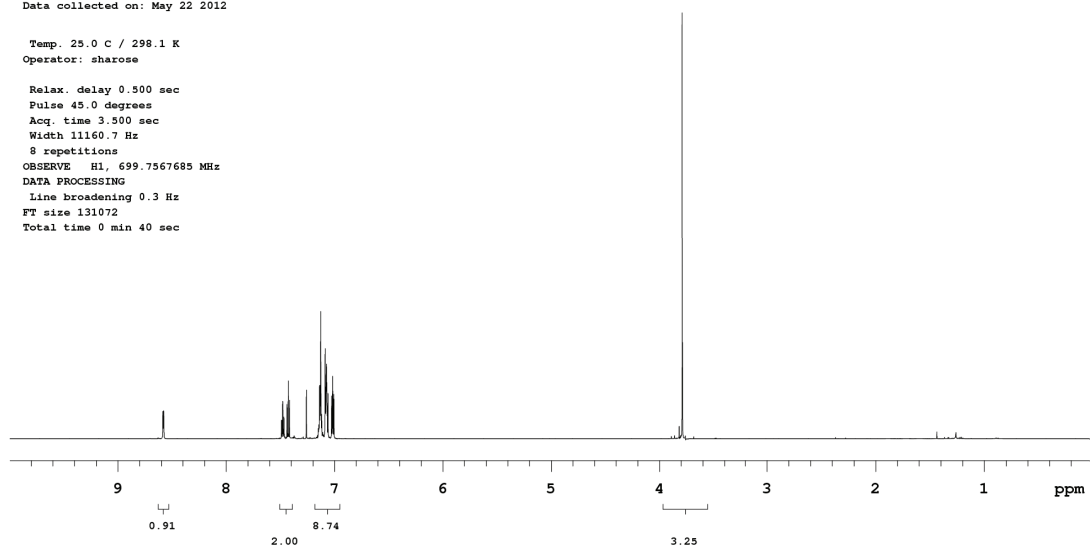



10SRN95\_13C

Sample Name:

Data Collected on:

Yb-vmas700

Archive directory:

Sample directory:

FidFile: 10SRN95\_13C

Pulse Sequence: CARBON (s2pul)

Solvent: cdc13

Data collected on: May 22 2012

Temp. 25.0 C / 298.1 K

Operator: sharose

Relax. delay 0.100 sec

Pulse 45.0 degrees

Acq. time 1.468 sec

Width 44642.9 Hz

560 repetitions

OBSERVE C13, 175.9539830 MHz

DECOUPLE H1, 699.7602734 MHz

Power 45 dB

continuously on

WALTZ-16 modulated

DATA PROCESSING

Line broadening 1.0 Hz

FT size 131072

Total time 14 min

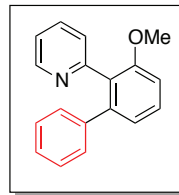

Agilent Technologies

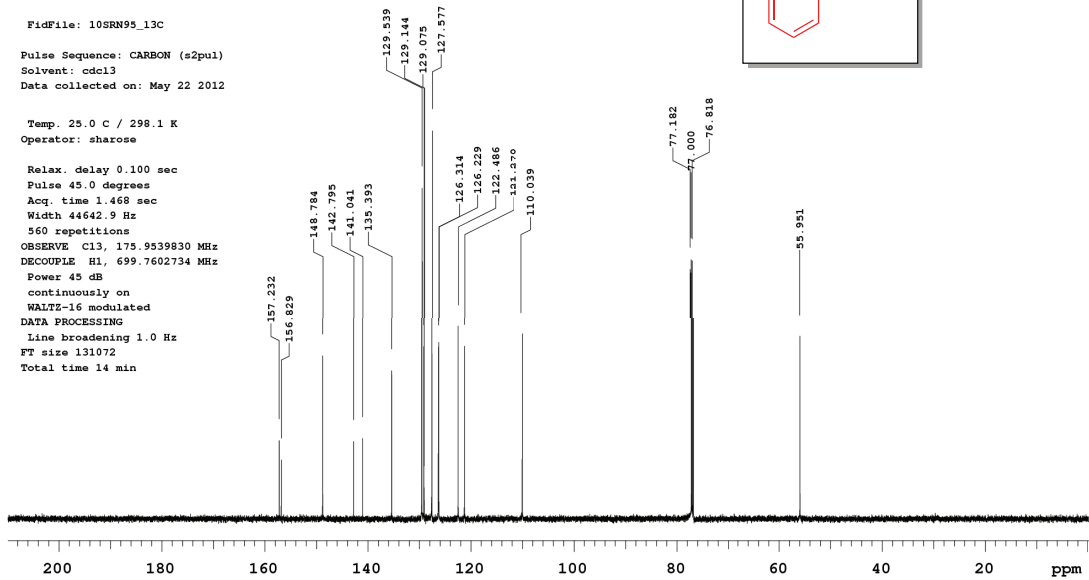

10SRN89\_1H

Sample Name:

Data Collected on:

Yb-vnmrs700

Archive directory:

Sample directory:

FidFile: 10SRN89\_1H

Pulse Sequence: PROTON (s2pul)

Solvent: cdcl3

Data collected on: May 20 2012

Temp. 25.0 C / 298.1 K

Operator: sharose

Relax. delay 0.500 sec

Pulse 45.0 degrees

Acq. time 3.500 sec

Width 11160.7 Hz

8 repetitions

OBSERVE H1, 699.756766 MHz

DATA PROCESSING

Line broadening 0.3 Hz

FT size 131072

Total time 0 min 40 sec

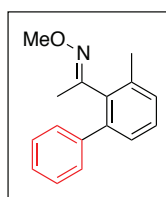

Agilent Technologies

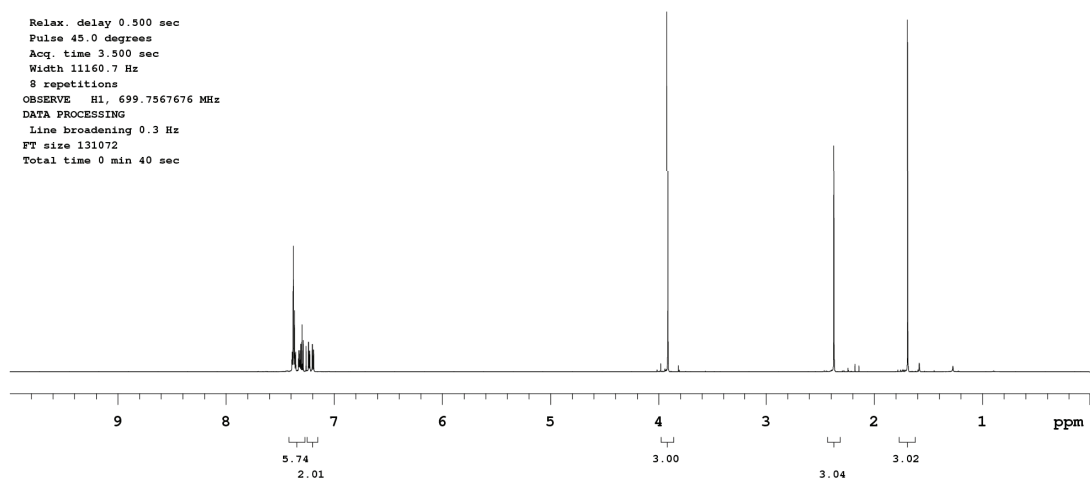

10SRN89\_13C

Sample Name:

Data Collected on:

Yb-vmas700

Archive directory:

Sample directory:

FidFile: 10SRN89\_13C

Pulse Sequence: CARBON (s2pul)

Solvent: cdc13

Data collected on: May 20 2012

Temp. 25.0 C / 298.1 K

Operator: sharose

Relax. delay 0.100 sec

Pulse 45.0 degrees

Acq. time 1.468 sec

Width 44642.9 Hz

720 repetitions

OBSERVE C13, 175.9539837 MHz

DECOUPLE H1, 699.7602734 MHz

Power 45 dB

continuously on

WALTZ-16 modulated

DATA PROCESSING

Line broadening 1.0 Hz

FT size 131072

Total time 18 min

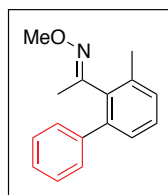

Agilent Technologies

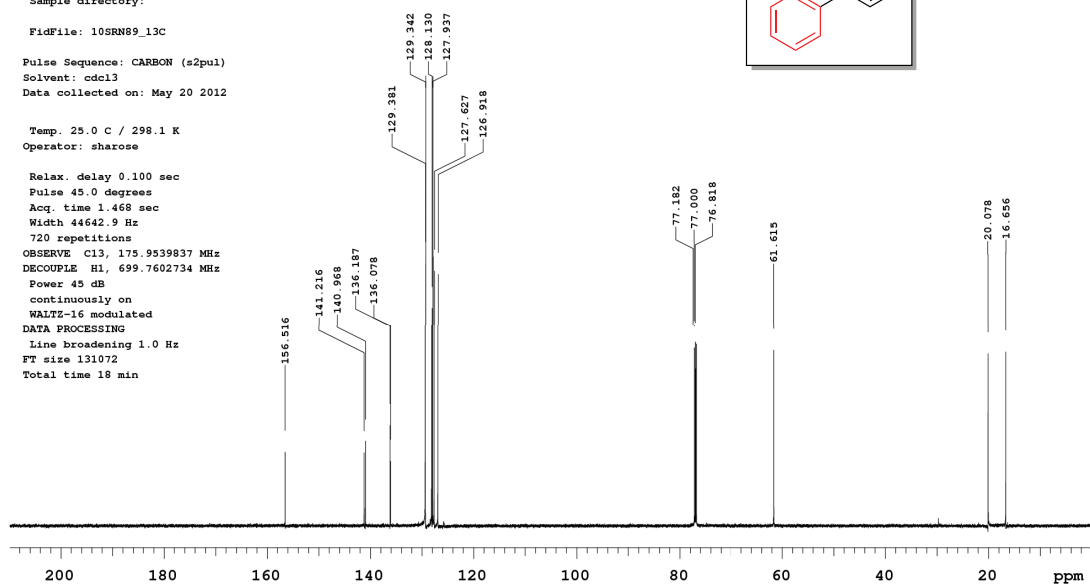

10SRN103\_major\_PhH

Sample Name:

Data Collected on:

Yb-vnmrs700

Archive directory:

Sample directory:

FidFile: 10SRN103\_major\_PhH

Pulse Sequence: PROTON (s2pul)

Solvent: c6d6

Data collected on: Jun 2 2012

Temp. 20.0 C / 293.1 K  
Operator: sharose

Relax. delay 0.500 sec

Pulse 45.0 degrees

Acq. time 3.500 sec

Width 11160.7 Hz

16 repetitions

OBSERVE H1, 699.7567977 MHz

DATA PROCESSING

Line broadening 0.3 Hz

FT size 131072

Total time 1 min 12 sec

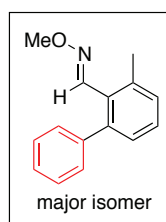

Agilent Technologies

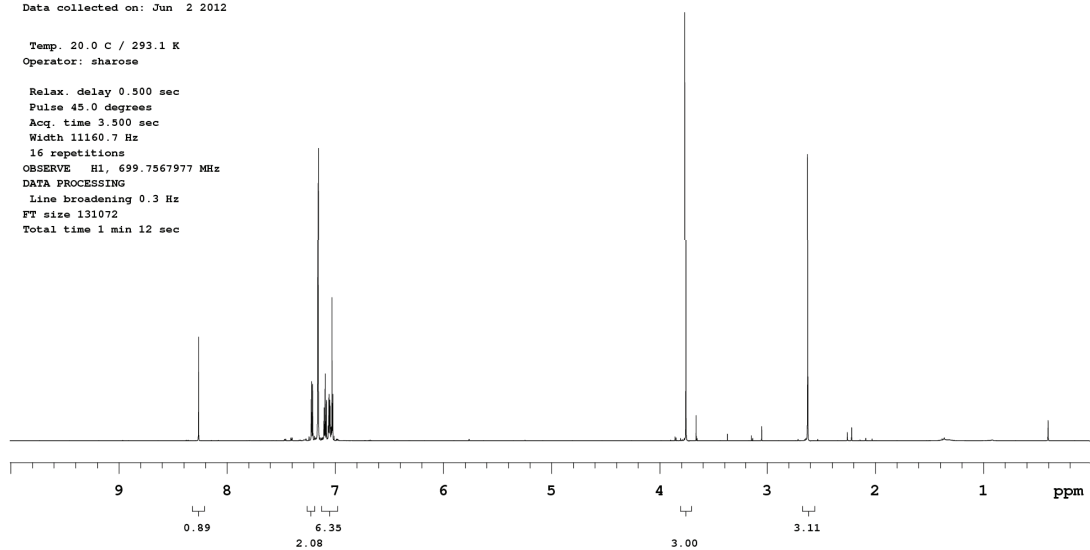

10SRN103\_major\_13C

Sample Name:

Data Collected on:  
Ge Chem LSA UMICH.edu-vnmrs400  
Archive directory:

Sample directory:

FidFile: 10SRN103\_major\_13C

Pulse Sequence: CARBON (s2pul)  
Solvent: c6d6  
Data collected on: May 25 2012

Operator: sharose

Relax. delay 0.100 sec  
Pulse 45.0 degrees  
Acq. time 2.621 sec  
Width 25000.0 Hz  
176 repetitions  
OBSERVE C13, 100.4628325 MHz  
DECOUPLE H1, 399.5357480 MHz  
Power 42 dB  
continuously on  
WALTZ-16 modulated  
DATA PROCESSING  
Line broadening 1.0 Hz  
FT size 131072  
Total time 7 min 59 sec

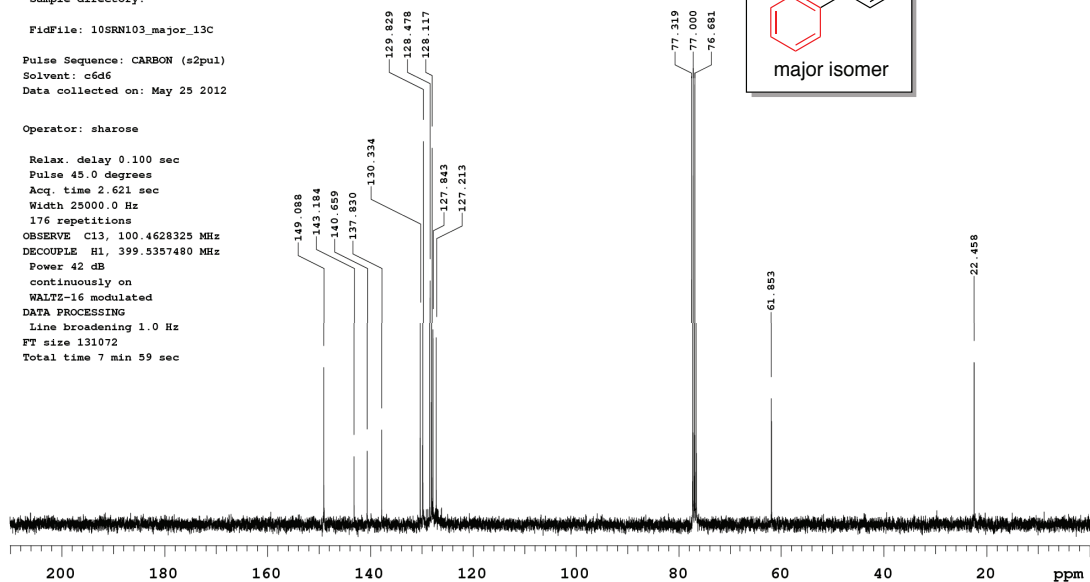

10SRN103\_minor\_PhH

Sample Name:

Data Collected on:

Yb-vnmrs700

Archive directory:

Sample directory:

FidFile: 10SRN103\_minor\_PhH

Pulse Sequence: PROTON (s2pul)

Solvent: c6d6

Data collected on: Jun 1 2012

Operator: sharose

Relax. delay 0.500 sec

Pulse 45.0 degrees

Acq. time 3.500 sec

Width 11160.7 Hz

8 repetitions

OBSERVE H1, 699.7567981 MHz

DATA PROCESSING

Line broadening 0.3 Hz

FT size 131072

Total time 0 min 40 sec

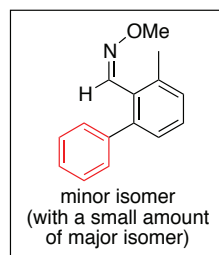

Agilent Technologies

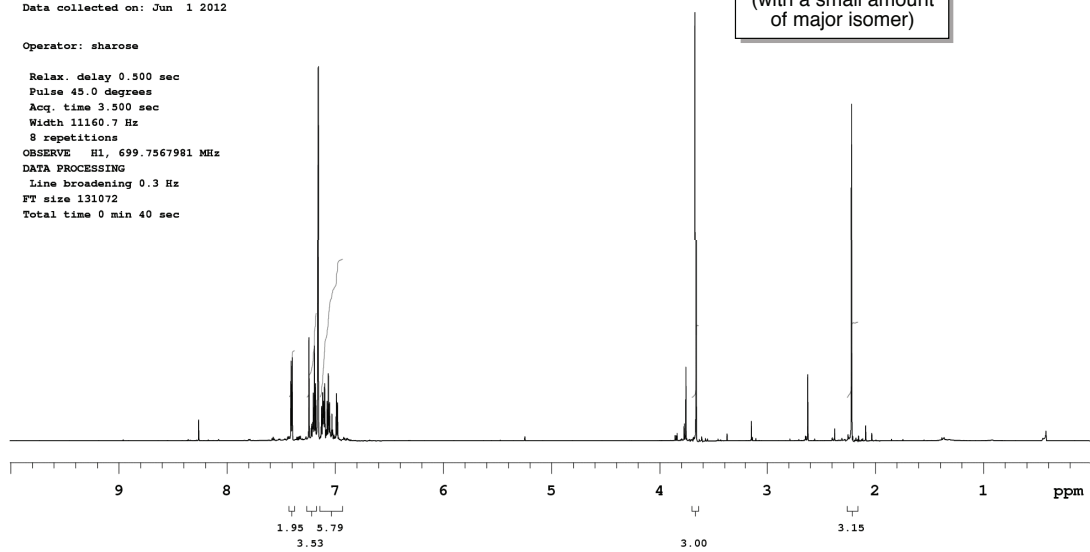

10SRN103\_minor\_13C

Sample Name:

Data Collected on:  
Ge. Chem. LSA. Umich.edu-vnmrs400  
Archive directory:

Sample directory:

FidFile: 10SRN103\_minor\_13C

Pulse Sequence: CARBON (s2pul)  
Solvent: cdc13  
Data collected on: May 25 2012

Operator: sharose

Relax. delay 0.100 sec  
Pulse 45.0 degrees  
Acq. time 2.621 sec  
Width 25000.0 Hz  
272 repetitions  
OBSERVE C13, 100.4628326 MHz  
DECOUPLE H1, 399.5357121 MHz  
Power 42 dB  
continuously on  
WALTZ-16 modulated  
DATA PROCESSING  
Line broadening 1.0 Hz  
FT size 131072  
Total time 12 min

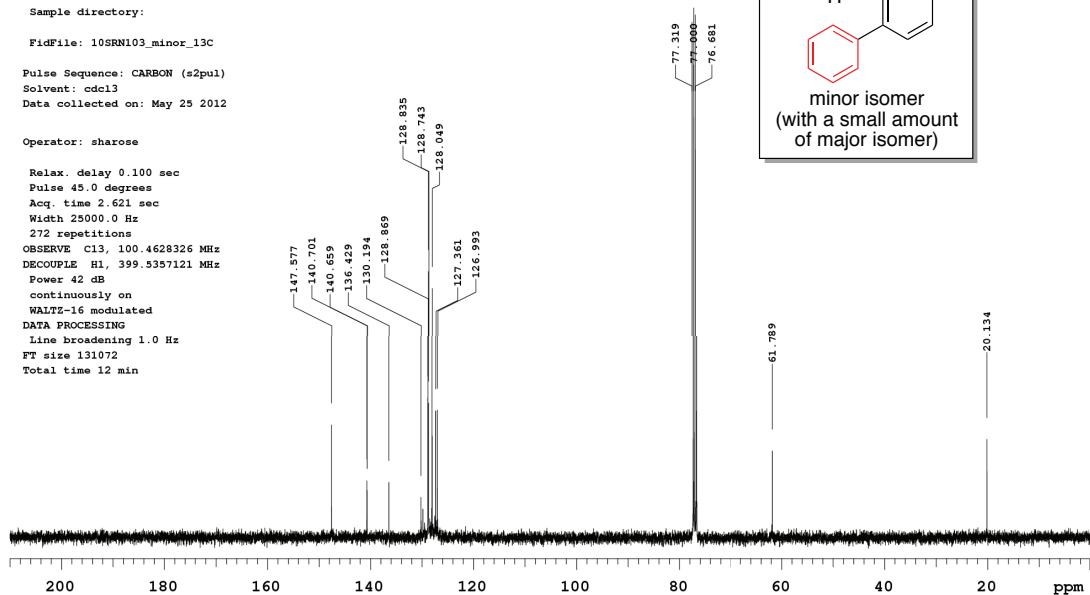

10SRN48\_1H

Sample Name:

Data Collected on:

Yb-vnmrs700

Archive directory:

Sample directory:

FidFile: 10SRN48\_1H

Pulse Sequence: PROTON (s2pul)

Solvent: cdcl3

Data collected on: May 4 2012

Temp. 25.0 C / 298.1 K  
Operator: sharose

Relax. delay 0.500 sec  
Pulse 45.0 degrees  
Acq. time 3.500 sec  
Width 11160.7 Hz  
4 repetitions

OBSERVE H1, 699.7570869 MHz

DATA PROCESSING

Line broadening 0.3 Hz

FT size 131072

Total time 0 min 24 sec

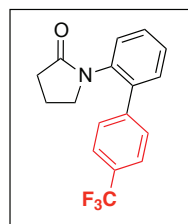

Agilent Technologies

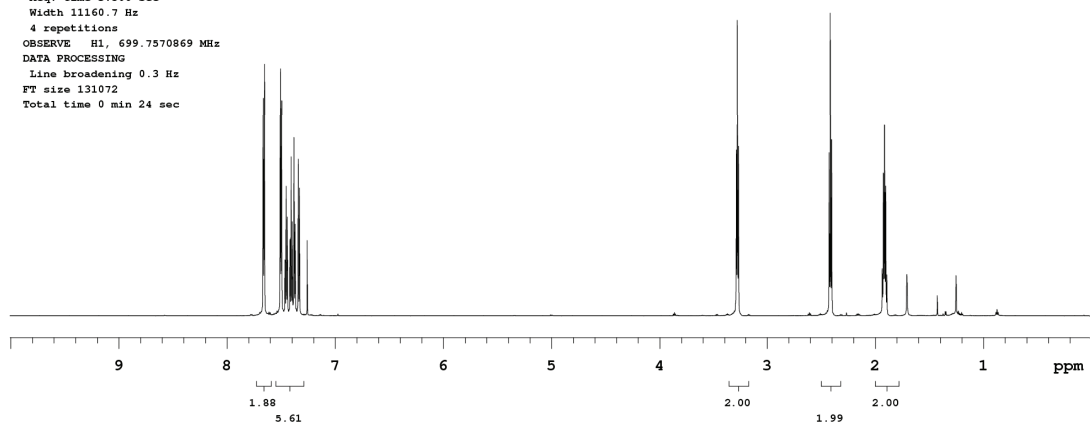



10SRN48\_13C

Sample Name:

Data Collected on:

Yb-vnmrs700

Archive directory:

Sample directory:

FidFile: 10SRN48\_13C

Pulse Sequence: CARBON (s2pul)

Solvent: cdc13

Data collected on: May 10 2012

Temp. 25.0 C / 298.1 K

Operator: sharose

Relax. delay 0.100 sec

Pulse 45.0 degrees

Acq. time 1.468 sec

Width 44642.9 Hz

448 repetitions

OBSERVE C13, 175.9539837 MHz

DECOUPLE H1, 699.7602734 MHz

Power 46 dB

continuously on

WALTZ-16 modulated

DATA PROCESSING

Line broadening 1.0 Hz

FT size 131072

Total time 11 min

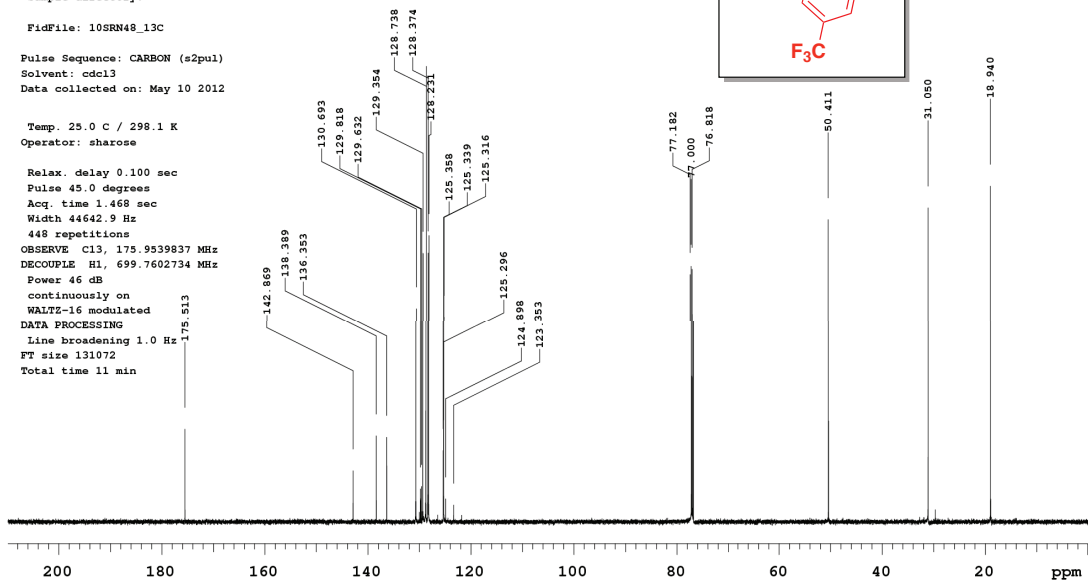

10SRN59\_1H-700

Sample Name:

Data Collected on:

Yb-vnmrs700

Archive directory:

Sample directory:

FidFile: 10SRN59\_1H-700

Pulse Sequence: PROTON (s2pul)

Solvent: cdc13

Data collected on: May 12 2012

Temp. -25.0 C / 248.2 K

Operator: sharose

Relax. delay 0.500 sec

Pulse 45.0 degrees

Acq. time 3.500 sec

Width 11160.7 Hz

4 repetitions

OBSERVE H1, 699.7567668 MHz

DATA PROCESSING

Line broadening 0.3 Hz

FT size 131072

Total time 0 min 24 sec

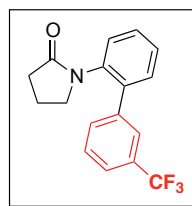

Agilent Technologies

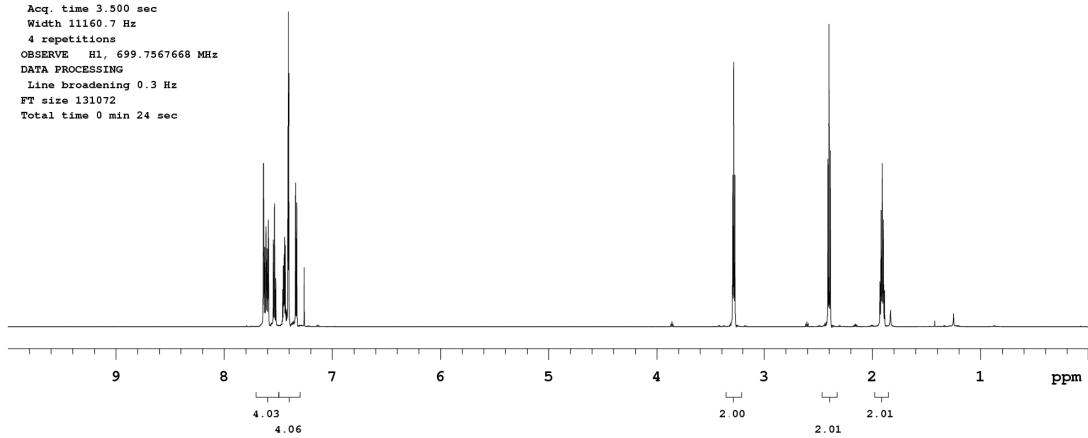

10SRN59\_13C\_clean\_700

Sample Name:

Data Collected on:  
Yb-vmas700

Archive directory:

Sample directory:

FidFile: 10SRN59\_13C\_clean\_700

Pulse Sequence: CARBON (s2pul)

Solvent: cdc13

Data collected on: May 12 2012

Temp. -25.0 C / 248.2 K

Operator: sharose

Relax. delay 0.100 sec

Pulse 45.0 degrees

Acq. time 1.468 sec

Width 44642.9 Hz

736 repetitions

OBSERVE C13, 175.9539918 MHz

DECOUPLE H1, 699.7602734 MHz

Power 46 dB

continuously on

WALTZ-16 modulated

DATA PROCESSING

Line broadening 1.0 Hz

FT size 131072

Total time 19 min

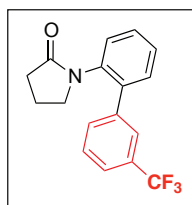

Agilent Technologies

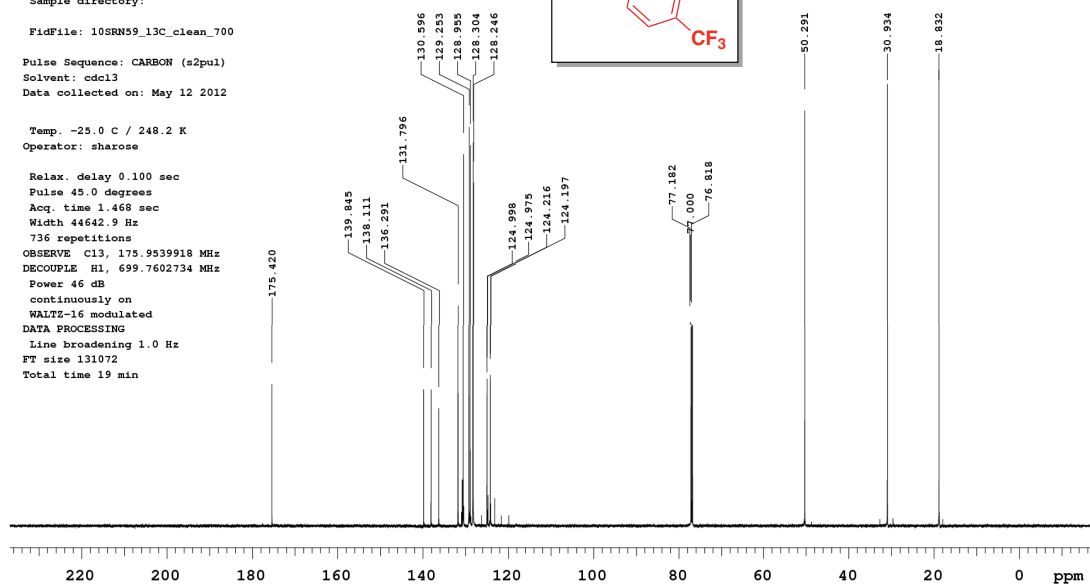

10SRN59\_19F

Sample Name:

Data Collected on:  
Yb-vnmrs700

Archive directory:

Sample directory:

FidFile: 10SRN59\_19F

Pulse Sequence: FLUORINE (s2pul)  
Solvent: cdc13  
Data collected on: May 12 2012

Temp. -25.0 C / 248.2 K  
Operator: sharose

Relax. delay 1.000 sec  
Pulse 30.0 degrees  
Acq. time 0.891 sec  
Width 147.1 kHz  
16 repetitions  
OBSERVE F19, 658.4292598 MHz  
DATA PROCESSING  
Line broadening 1.5 Hz  
FT size 262144  
Total time 0 min 34 sec

Agilent Technologies

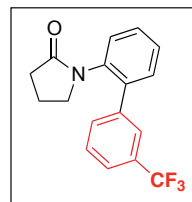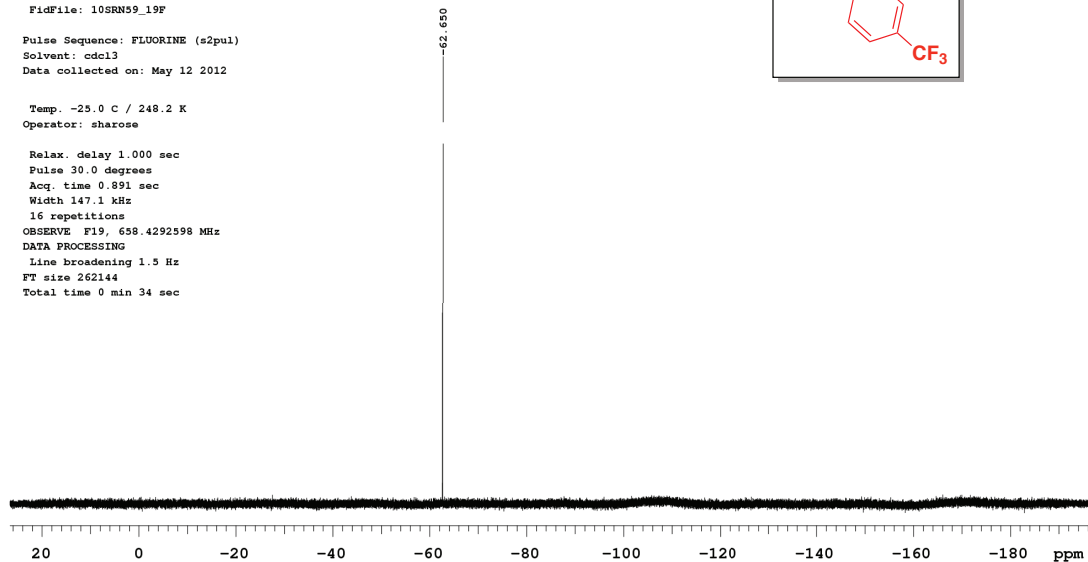

10SRN112\_clean\_1H

Sample Name:

Data Collected on:

Yb-vnmrs700

Archive directory:

Sample directory:

FidFile: 10SRN112\_clean\_1H

Pulse Sequence: PROTON (s2pul)

Solvent: cdc13

Data collected on: Jun 2 2012

Temp. 20.0 C / 293.1 K  
Operator: sharose

Relax. delay 0.500 sec

Pulse 45.0 degrees

Acq. time 3.500 sec

Width 11160.7 Hz

8 repetitions

OBSERVE H1, 699.7567661 MHz

DATA PROCESSING

Line broadening 0.3 Hz

FT size 131072

Total time 0 min 40 sec

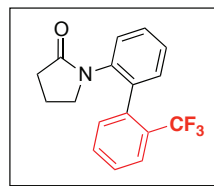

Agilent Technologies

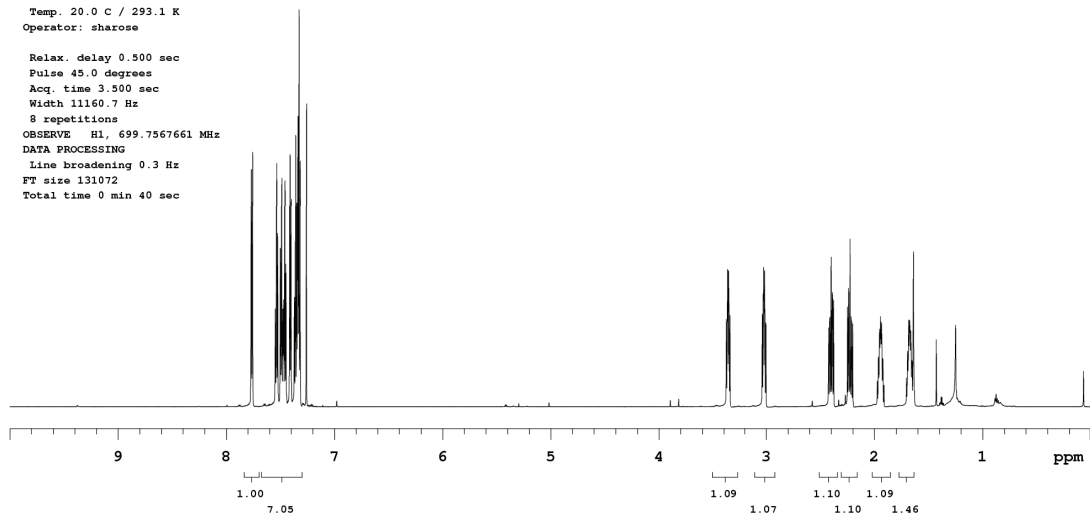

10SRN112\_clean\_13C

Sample Name:

Data Collected on:

Yb-vmas700

Archive directory:

Sample directory:

FidFile: 10SRN112\_clean\_13C

Pulse Sequence: CARBON (s2pul)

Solvent: cdc13

Data collected on: Jun 2 2012

Temp. 20.0 C / 293.1 K

Operator: sharose

Relax. delay 0.100 sec

Pulse 45.0 degrees

Acq. time 1.468 sec

Width 44642.9 Hz

4432 repetitions

OBSERVE C13, 175.9539830 MHz

DECOUPLE H1, 699.7602734 MHz

Power 39 dB

continuously on

WALTZ-16 modulated

DATA PROCESSING

Line broadening 1.0 Hz

FT size 131072

Total time 1 hr, 55 min

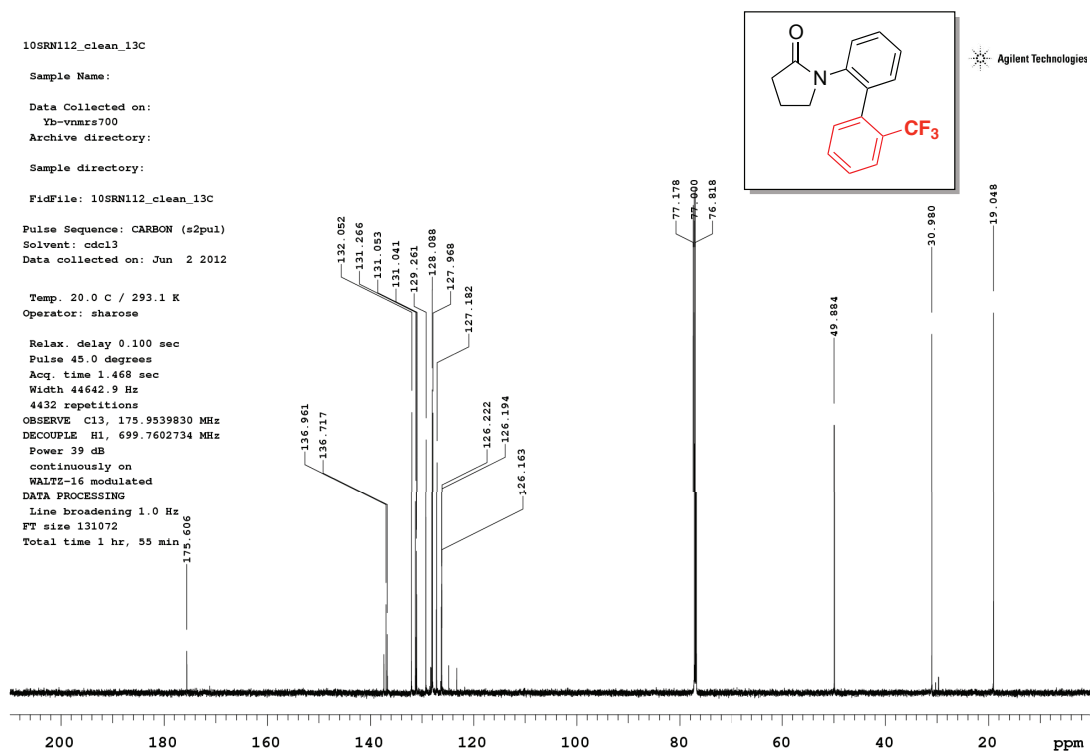

10SRN112\_19F

Sample Name:

Data Collected on:  
Ge Chem LSA UMICH.edu-vnmrs400  
Archive directory:

Sample directory:

FidFile: 10SRN112\_19F

Pulse Sequence: FLUORINE (s2pul)  
Solvent: cdc13  
Data collected on: Jun 3 2012

Operator: sharose

Relax. delay 1.000 sec  
Pulse 30.0 degrees  
Acq. time 0.734 sec  
Width 89285.7 Hz  
16 repetitions  
OBSERVE F19, 375.9372901 MHz  
DATA PROCESSING  
Line broadening 0.5 Hz  
FT size 131072  
Total time 0 min 31 sec

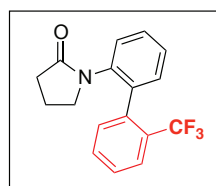

Agilent Technologies

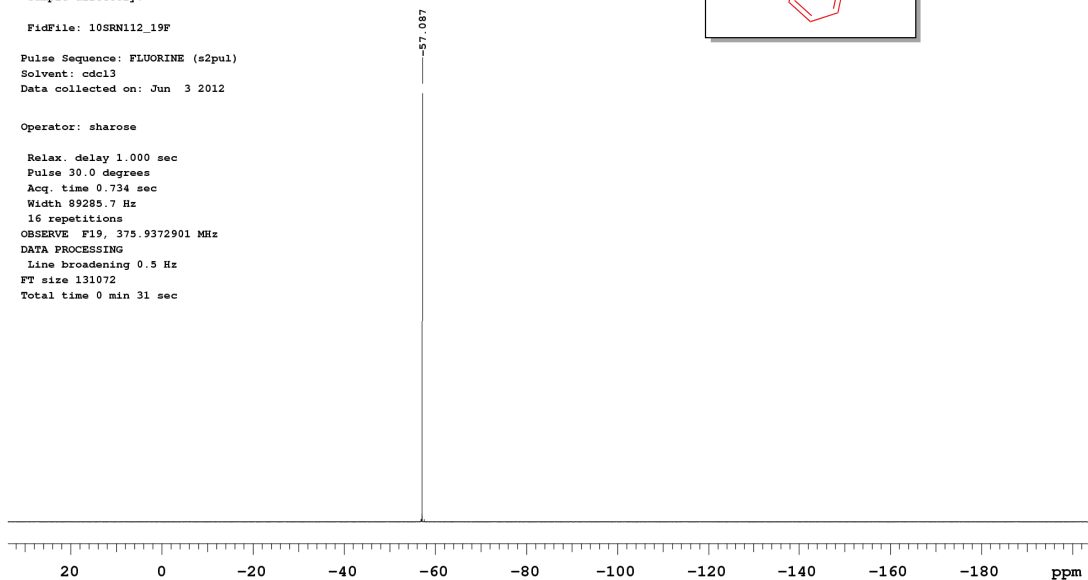

10SRN49\_1H

Sample Name:

Data Collected on:

Yb-vnmrs700

Archive directory:

Sample directory:

FidFile: 10SRN49\_1H

Pulse Sequence: PROTON (s2pul)

Solvent: cdcl3

Data collected on: May 4 2012

Temp. 25.0 C / 298.1 K  
Operator: sharose

Relax. delay 0.500 sec  
Pulse 45.0 degrees  
Acq. time 3.500 sec  
Width 11160.7 Hz  
8 repetitions

OBSERVE H1, 699.7567680 MHz

DATA PROCESSING

Line broadening 0.3 Hz

FT size 131072

Total time 0 min 40 sec

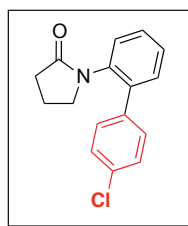

Agilent Technologies

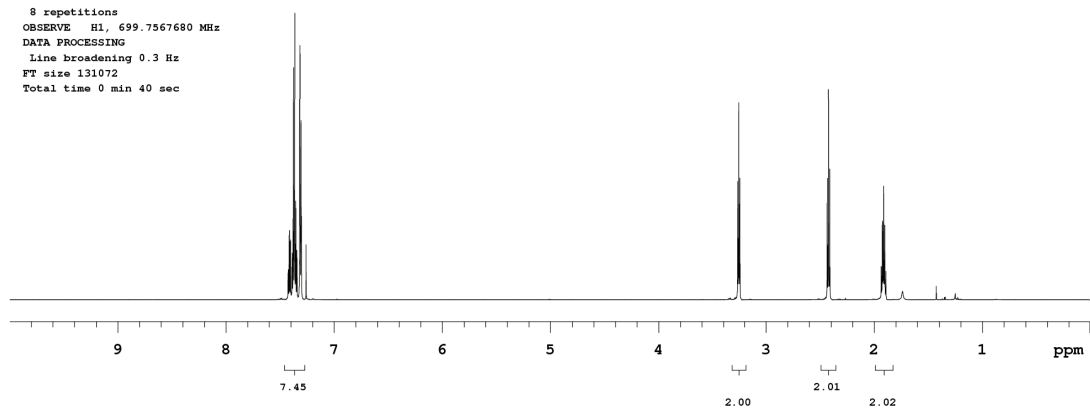



10SRN49\_13C

Sample Name:

Data Collected on:

Yb-vmas700

Archive directory:

Sample directory:

FidFile: 10SRN49\_13C

Pulse Sequence: CARBON (s2pul)

Solvent: cdc13

Data collected on: May 4 2012

Temp. 25.0 C / 298.1 K

Operator: sharose

Relax. delay 0.100 sec

Pulse 45.0 degrees

Acq. time 1.468 sec

Width 44642.9 Hz

1000 repetitions

OBSERVE C13, 175.9539877 MHz

DECOUPLE H1, 699.7602734 MHz

Power 46 dB

continuously on

WALTZ-16 modulated

DATA PROCESSING

Line broadening 1.0 Hz

FT size 131072

Total time 26 min

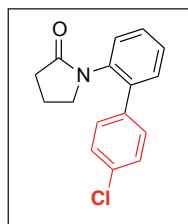

Agilent Technologies

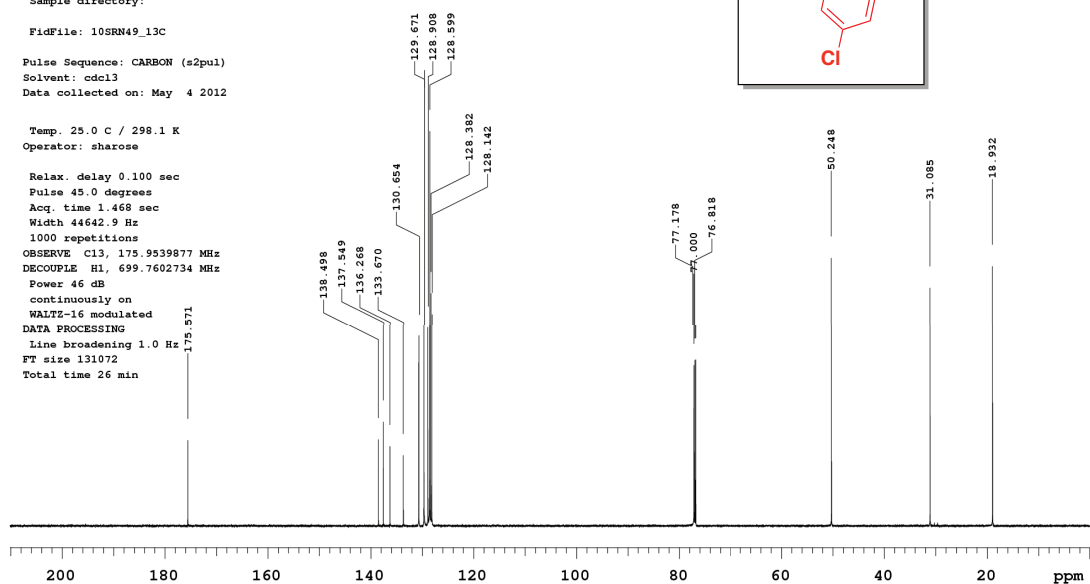

10SRN60\_1H

Sample Name:

Data Collected on:  
Te-vnmrs500

Archive directory:

Sample directory:

FidFile: 10SRN60\_1H

Pulse Sequence: PROTON (s2pul)  
Solvent: cdc13  
Data collected on: May 12 2012

Operator: sharose

Relax. delay 0.500 sec  
Pulse 45.0 degrees  
Acq. time 3.500 sec  
Width 8012.8 Hz  
16 repetitions  
OBSERVE H1, 500.0931592 MHz  
DATA PROCESSING  
Line broadening 0.3 Hz  
FT size 65536  
Total time 1 min 12 sec

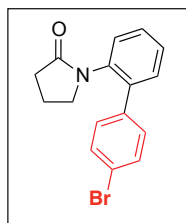

Agilent Technologies

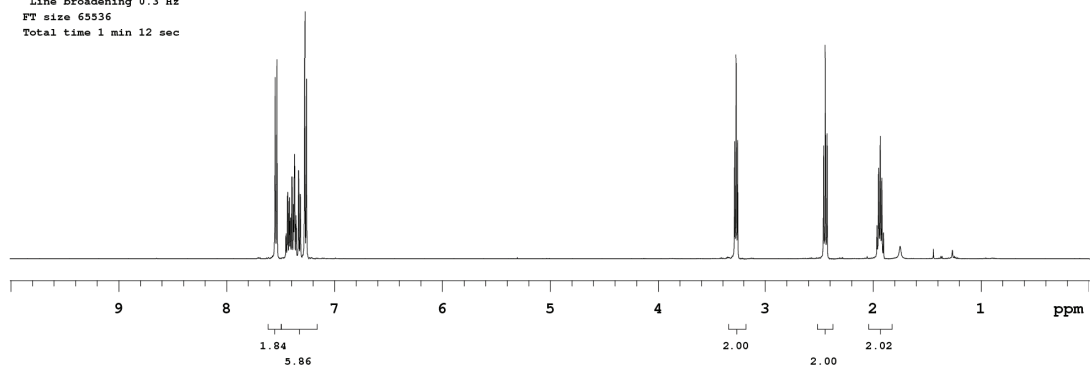

10SRN60\_13C

Sample Name:

Data Collected on:  
Te-vnmrs500

Archive directory:

Sample directory:

FidFile: 10SRN60\_13C

Pulse Sequence: CARBON (s2pul)  
Solvent: cdc13  
Data collected on: May 12 2012

Operator: sharose

Relax. delay 0.100 sec  
Pulse 45.0 degrees  
Acq. time 1.049 sec  
Width 31250.0 Hz  
208 repetitions  
OBSERVE C13, 125.7489335 MHz  
DECOUPLE H1, 500.0956704 MHz  
Power 41 dB  
continuously on  
WALTZ-16 modulated  
DATA PROCESSING  
Line broadening 1.0 Hz  
FT size 65536  
Total time 3 min 58 sec

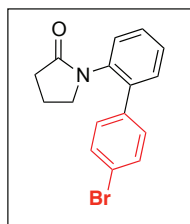

Agilent Technologies

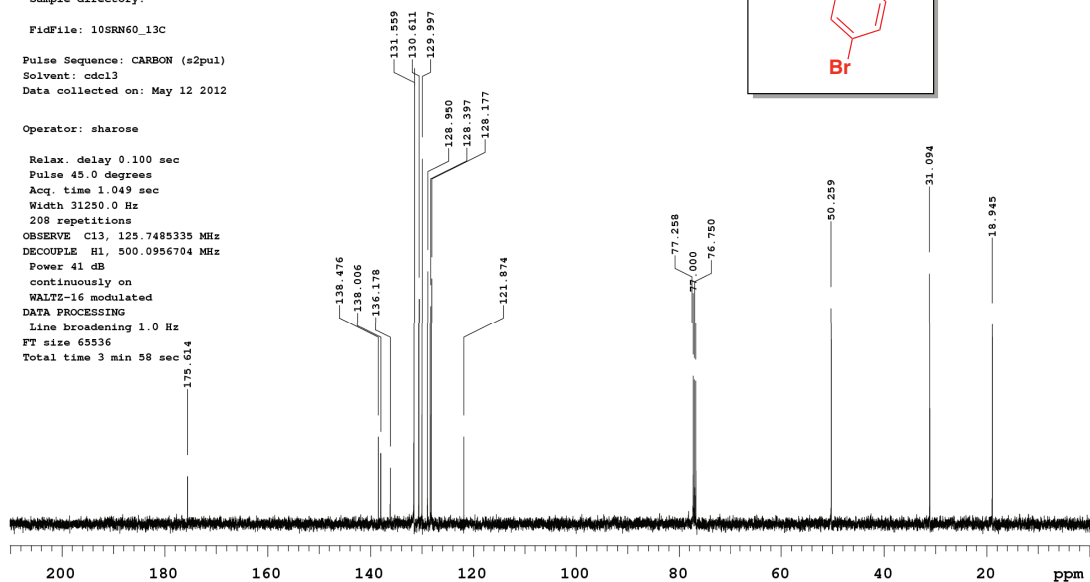

10SRN96\_1H

Sample Name:

Data Collected on:

Yb-vnmrs700

Archive directory:

Sample directory:

FidFile: 10SRN96\_1H

Pulse Sequence: PROTON (s2pul)

Solvent: cdcl3

Data collected on: May 22 2012

Temp. 25.0 C / 298.1 K

Operator: sharose

Relax. delay 0.500 sec

Pulse 45.0 degrees

Acq. time 3.500 sec

Width 11160.7 Hz

8 repetitions

OBSERVE H1, 699.7567683 MHz

DATA PROCESSING

Line broadening 0.3 Hz

FT size 131072

Total time 0 min 40 sec

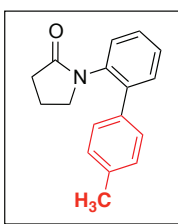

Agilent Technologies

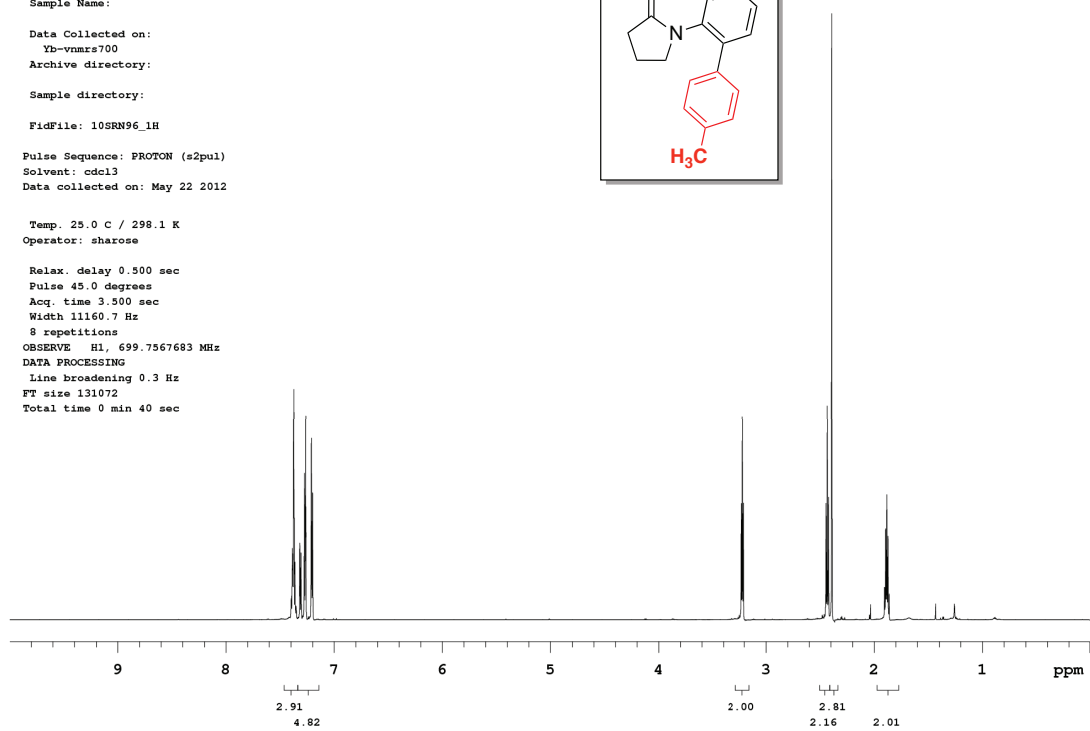

10SRN96\_13C

Sample Name:

Data Collected on:

Yb-vmas700

Archive directory:

Sample directory:

FidFile: 10SRN96\_13C

Pulse Sequence: CARBON (s2pul)

Solvent: cdc13

Data collected on: May 22 2012

Temp. 25.0 C / 298.1 K

Operator: sharose

Relax. delay 0.100 sec

Pulse 45.0 degrees

Acq. time 1.468 sec

Width 44642.9 Hz

320 repetitions

OBSERVE C13, 175.9539843 MHz

DECOUPLE H1, 699.7602734 MHz

Power 45 dB

continuously on

WALTZ-16 modulated

DATA PROCESSING

Line broadening 1.0 Hz

FT size 131072

Total time 8 min 21 sec

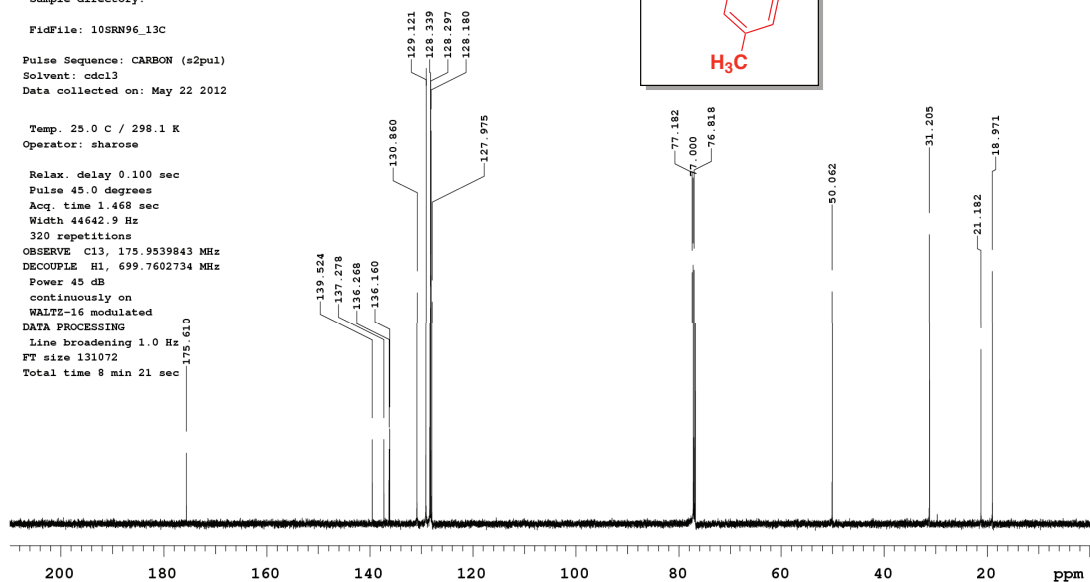

Agilent Technologies

10SRN50\_1H

Sample Name:

Data Collected on:

Yb-vnmrs700

Archive directory:

Sample directory:

FidFile: 10SRN50\_1H

Pulse Sequence: PROTON (s2pul)

Solvent: cdcl3

Data collected on: May 4 2012

Temp. 25.0 C / 298.1 K

Operator: sharose

Relax. delay 0.500 sec

Pulse 45.0 degrees

Acq. time 3.500 sec

Width 11160.7 Hz

8 repetitions

OBSERVE H1, 699.7567710 MHz

DATA PROCESSING

Line broadening 0.3 Hz

FT size 131072

Total time 0 min 40 sec

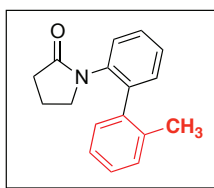

Agilent Technologies

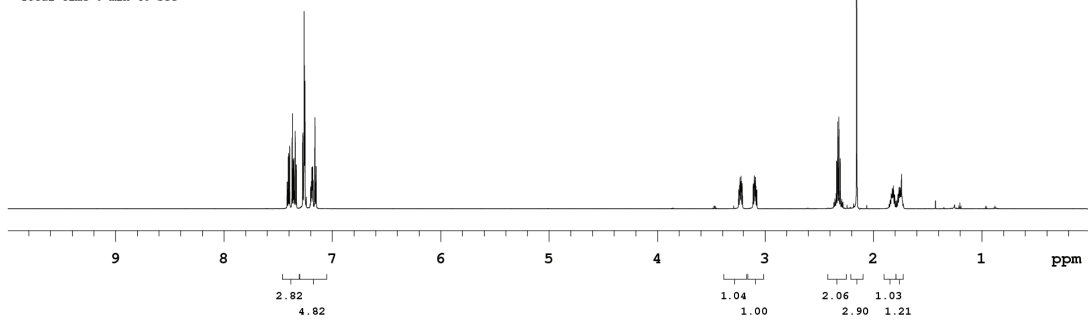

10SRN50\_13C

Sample Name:

Data Collected on:

Yb-vmas700

Archive directory:

Sample directory:

FidFile: 10SRN50\_13C

Pulse Sequence: CARBON (s2pul)

Solvent: cdc13

Data collected on: May 4 2012

Temp. 25.0 C / 298.1 K

Operator: sharose

Relax. delay 0.100 sec

Pulse 45.0 degrees

Acq. time 1.468 sec

Width 44642.9 Hz

96 repetitions

OBSERVE C13, 175.9539864 MHz

DECOUPLE H1, 699.7602730 MHz

Power 46 dB

continuously on

WALTZ-16 modulated

DATA PROCESSING

Line broadening 1.0 Hz

FT size 131072

Total time 2 min 30 sec

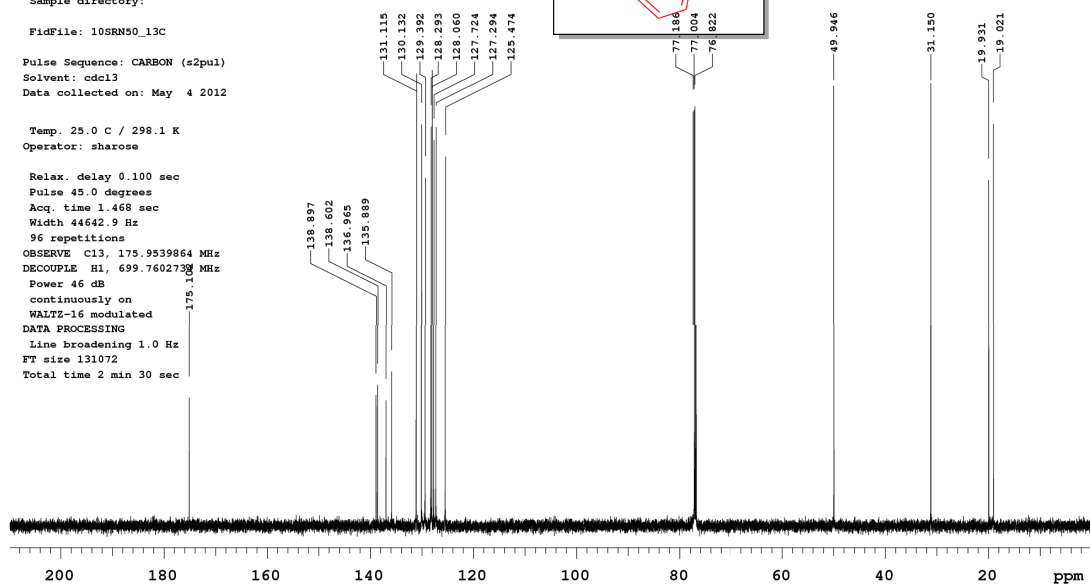

Agilent Technologies

10SRN85\_1H

Sample Name:

Data Collected on:

Yb-vnmrs700

Archive directory:

Sample directory:

FidFile: 10SRN85\_1H

Pulse Sequence: PROTON (s2pul)

Solvent: cdcl3

Data collected on: May 22 2012

Temp. 25.0 C / 298.1 K

Operator: sharose

Relax. delay 0.500 sec

Pulse 45.0 degrees

Acq. time 3.500 sec

Width 11160.7 Hz

8 repetitions

OBSERVE H1, 699.7567683 MHz

DATA PROCESSING

Line broadening 0.3 Hz

FT size 131072

Total time 0 min 40 sec

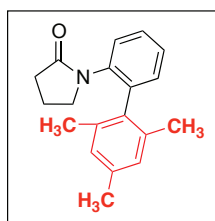

Agilent Technologies

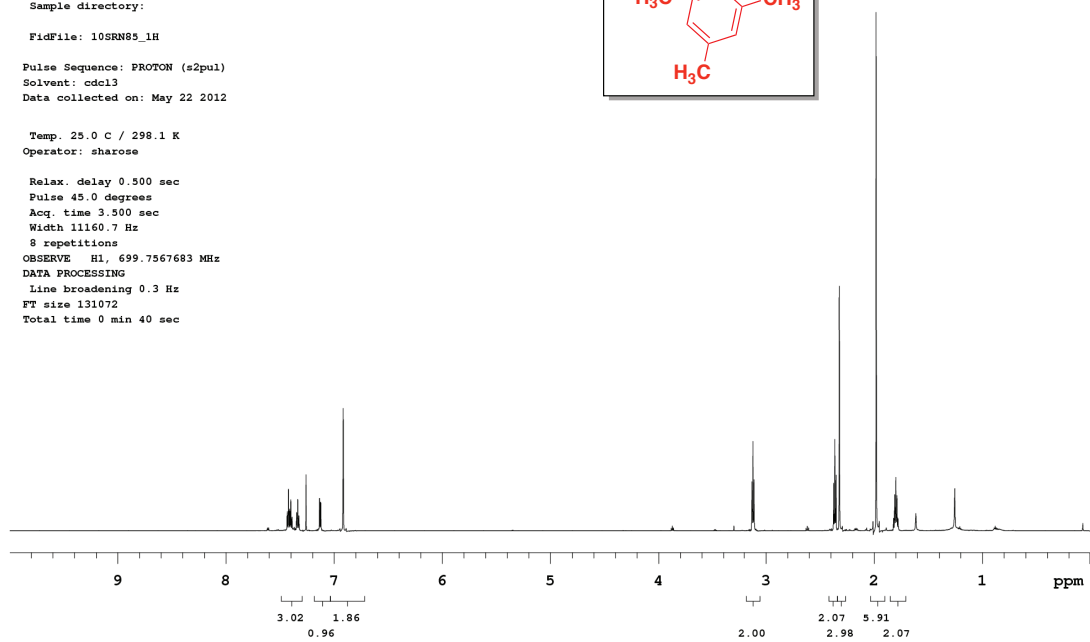



10SRN85\_13C

Sample Name:

Data Collected on:

Yb-vmas700

Archive directory:

Sample directory:

FidFile: 10SRN85\_13C

Pulse Sequence: CARBON (s2pul)

Solvent: cdc13

Data collected on: May 22 2012

Temp. 25.0 C / 298.1 K

Operator: sharose

Relax. delay 0.100 sec

Pulse 45.0 degrees

Acq. time 1.468 sec

Width 44642.9 Hz

1328 repetitions

OBSERVE C13, 175.9539809 MHz

DECOUPLE H1, 699.7602734 MHz

Power 45 dB

continuously on

WALTZ-16 modulated

DATA PROCESSING

Line broadening 1.0 Hz

FT size 131072

Total time 34 min

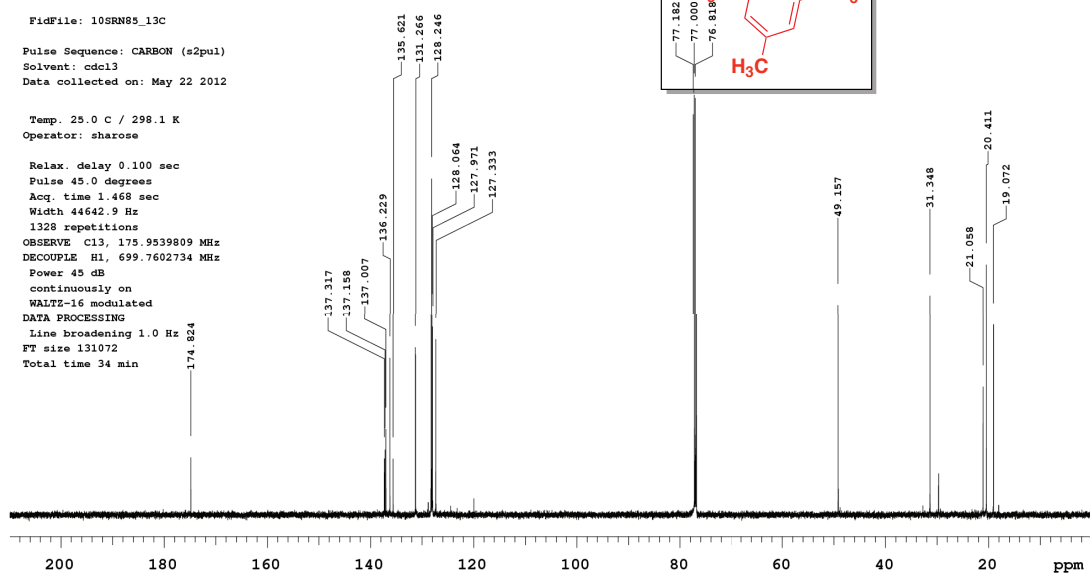

Agilent Technologies

10SRN61\_1H

Sample Name:

Data Collected on:

Te-vnmrs500

Archive directory:

Sample directory:

FidFile: 10SRN61\_1H

Pulse Sequence: PROTON (s2pul)

Solvent: cdc13

Data collected on: May 12 2012

Operator: sharose

Relax. delay 0.500 sec

Pulse 45.0 degrees

Acq. time 3.500 sec

Width 8012.8 Hz

16 repetitions

OBSERVE H1, 500.0931673 MHz

DATA PROCESSING

Line broadening 0.3 Hz

FT size 65536

Total time 1 min 12 sec

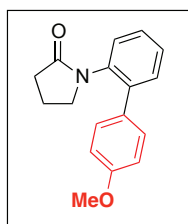

Agilent Technologies

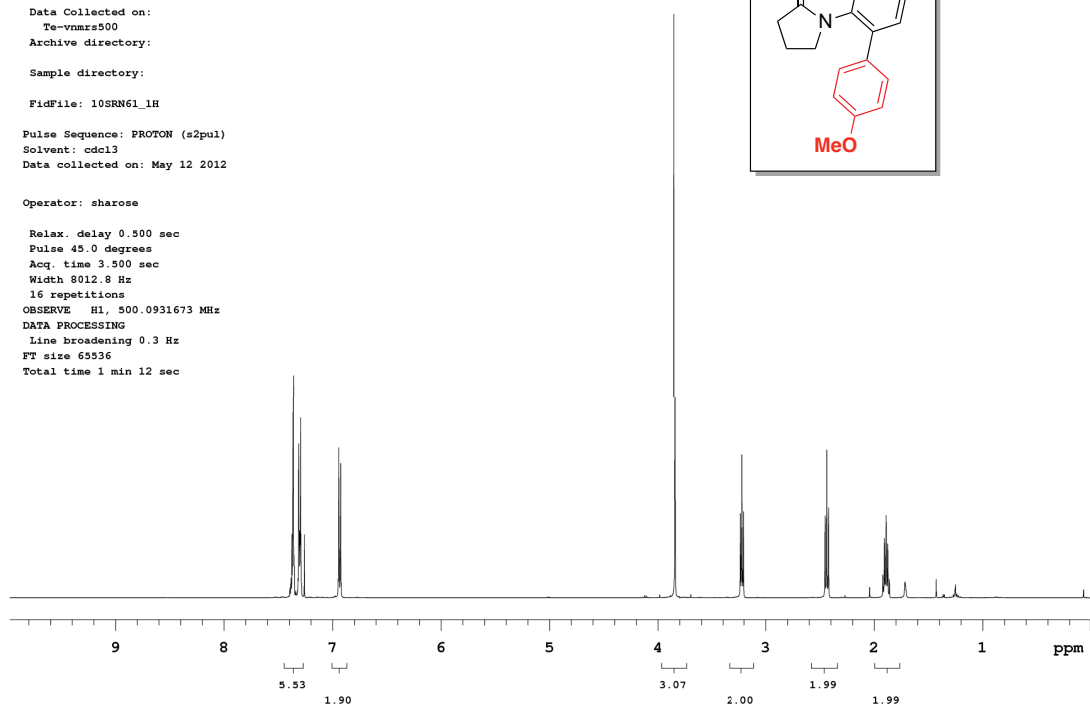

10SRN61\_13C

Sample Name:

Data Collected on:  
Te-vnmr500

Archive directory:

Sample directory:

FidFile: 10SRN61\_13C

Pulse Sequence: CARBON (s2pul)  
Solvent: cdc13  
Data collected on: May 12 2012

Operator: sharose

Relax. delay 0.100 sec  
Pulse 45.0 degrees  
Acq. time 1.049 sec  
Width 31250.0 Hz  
464 repetitions  
OBSERVE C13, 125.7489317 MHz  
DECOUPLE H1, 500.0956704 MHz  
Power 41 dB  
continuously on  
WALTZ-16 modulated  
DATA PROCESSING  
Line broadening 1.0 Hz  
FT size 65536  
Total time 8 min 53 sec

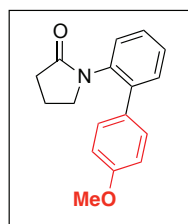

Agilent Technologies

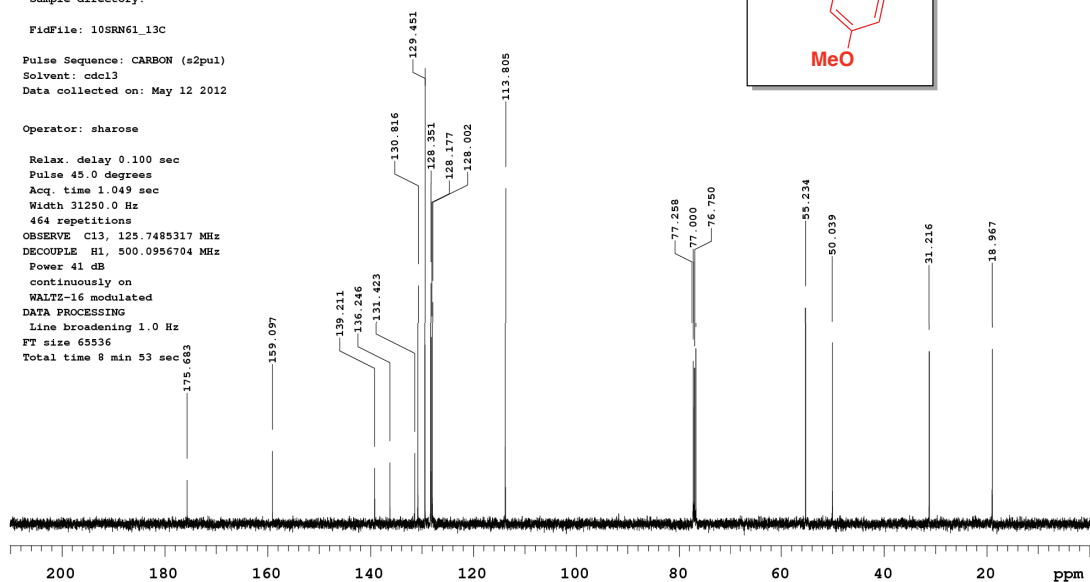

Supplement: NIHMS491460-supplement-Supporting_Information.pdf [file NIHMS491460-supplement-Supporting_Information.pdf]
